# Supplementary material for: Comparative efficacy and safety of lipid-lowering agents in patients with hypercholesterolemia: A frequentist network meta-analysis
Source: PubMed Central journal article supplement — Medicine (Baltimore). 2019 Feb 8;98(6):e14400. doi: 10.1097/MD.0000000000014400 (PMC6380691; doi:10.1097/md.0000000000014400), 2019-02-08
Supplement: medi-98-e14400-s001.pdf [file medi-98-e14400-s001.pdf]

## Eligible criteria

### The lists of source that was processed to manual search

**Table S1.** PRISMA NMA Checklist

**Table S2.** Electronic Search Strategies.

**Table S3.** Basic characteristics of included trials.

**Table S4.** Assessment of loop inconsistency in networks.

**Table S5.** Assessment of global inconsistency in network using the ‘design-by-treatment’ interaction model.

**Table S6.** Assessment of inconsistency in network using node-splitting method.

**Figure S1.** The summarized quality of included studies as assessed by tool recommended in Cochrane Collaboration guidelines.

**Figure S2.** Surface under the cumulative ranking probabilities of PCSK9 inhibitors, statins, and ezetimibe for (A) LDL cholesterol, (B) HDL cholesterol, (C) total cholesterol level. PCSK9 = proprotein convertase subtilisin-kexin type 9 serine protease.

**Figure S3.** Network comparison among statins, ezetimibe, and PCSK9 inhibitors for cardiovascular events in patients with hypercholesterolemia.

**Figure S4.** Surface under the cumulative ranking probabilities of statins, ezetimibe, PCSK9 inhibitors for cardiovascular events. PCSK9 = proprotein convertase subtilisin-kexin type 9 serine protease.

**Figure S5.** Surface under the cumulative ranking probabilities of statins, ezetimibe, PCSK9 inhibitors for (A) all-cause mortality and (B) cardiovascular mortality. PCSK9 = proprotein convertase subtilisin-kexin type 9 serine protease.

**Figure S6.** Surface under the cumulative ranking probabilities of statins, ezetimibe, PCSK9 inhibitors for (A) serious adverse events and (B) neurocognitive events. PCSK9 = proprotein convertase subtilisin-kexin type 9 serine protease.

**Figure S8.** Surface under the cumulative ranking probabilities of statins, ezetimibe, PCSK9 inhibitors for (A) new-onset diabetes, (B) alanine aminotransferase, and (C) creatine kinase. PCSK9 = proprotein convertase subtilisin-kexin type 9 serine protease.

**Figure S7.** Comparison-adjusted funnel plot for the network of (A) cardiovascular events, (B) all-cause mortality, and (C) cardiovascular mortality. Pla = placebo, Sta = Statins, Eze = Ezetimibe, P9 = proprotein convertase subtilisin-kexin type 9 serine protease.

## **eReferences**

Eligible criteria:

- 1) Participants were 18 years or older with hypercholesterolemia;
- 2) Lipid-lowering therapy with ezetimibe, statin, or PCSK9 inhibitor monotherapy.
- 3) One lipid-lowering agent compared with another lipid-lowering agent or placebo.
- 4) The trials should report one of the predefined outcomes, including low-density lipoprotein cholesterol, high density lipoprotein cholesterol, and total cholesterol, cardiovascular events, all-cause mortality, cardiovascular mortality, serious adverse events, neurocognitive event, new-onset diabetes, and elevation of serum creatine kinase (three to ten folds increase) and alanine aminotransferase level (three to ten folds increase).
- 5) Study was randomized controlled trial, and not included crossover randomized controlled trials or quasi-randomized.

### The lists of source that was processed to manual search

|                                         |                                                                                                                                                                                                                                                                                                                                                                                                                                                                                                                                                                                                                                                                                                  |
|-----------------------------------------|--------------------------------------------------------------------------------------------------------------------------------------------------------------------------------------------------------------------------------------------------------------------------------------------------------------------------------------------------------------------------------------------------------------------------------------------------------------------------------------------------------------------------------------------------------------------------------------------------------------------------------------------------------------------------------------------------|
| <b>Meta-analyses</b>                    | <ol style="list-style-type: none"><li>1. Efficacy and safety of more intensive lowering of LDL cholesterol: a meta-analysis of data from 170 000 participants in 26 randomised trials</li><li>2. The effects of lowering LDL cholesterol with statin therapy in people at low risk of vascular disease: meta-analysis of individual data from 27 randomised trials</li><li>3. Effect of statin and non-statin LDL-lowering medications on cardiovascular outcomes in secondary prevention: a meta-analysis of randomized trials</li><li>4. Association between baseline LDL-C level and total and cardiovascular mortality after LDL-C lowering: a systematic review and meta-analysis</li></ol> |
| <b>Reviews</b>                          | <ol style="list-style-type: none"><li>1. Low-density lipoproteins cause atherosclerotic cardiovascular disease. 1. Evidence from genetic, epidemiologic, and clinical studies. A consensus statement from the European Atherosclerosis Society Consensus Panel</li><li>2. 2016 ACC expert consensus decision pathway on the role of non-statin therapies for LDL-Cholesterol lowering in the management of atherosclerotic cardiovascular disease risk</li><li>3. 2016 European guidelines on cardiovascular disease prevention in clinical practice</li></ol>                                                                                                                                   |
| <b>Major cardiovascular conferences</b> | <ol style="list-style-type: none"><li>1. European Society of Cardiology Congress held in the past two years.</li><li>2. American College of Cardiology Congress held in the past two years.</li></ol>                                                                                                                                                                                                                                                                                                                                                                                                                                                                                            |

**Table S1: PRISMA NMA Checklist of Items to Include When Reporting A Systematic Review Involving a Network Meta-analysis**

| Section/Topic             | Item # | Checklist Item                                                                                                                                                                                                                                                                                                                                                                                                                                                                                                                                                                                                                                                                                                                                                                          | Reported on Page # |
|---------------------------|--------|-----------------------------------------------------------------------------------------------------------------------------------------------------------------------------------------------------------------------------------------------------------------------------------------------------------------------------------------------------------------------------------------------------------------------------------------------------------------------------------------------------------------------------------------------------------------------------------------------------------------------------------------------------------------------------------------------------------------------------------------------------------------------------------------|--------------------|
| <b>TITLE</b>              |        |                                                                                                                                                                                                                                                                                                                                                                                                                                                                                                                                                                                                                                                                                                                                                                                         |                    |
| Title                     | 1      | Identify the report as a systematic review <i>incorporating a network meta-analysis (or related form of meta-analysis)</i> .                                                                                                                                                                                                                                                                                                                                                                                                                                                                                                                                                                                                                                                            | 1                  |
| <b>ABSTRACT</b>           |        |                                                                                                                                                                                                                                                                                                                                                                                                                                                                                                                                                                                                                                                                                                                                                                                         |                    |
| Structured summary        | 2      | Provide a structured summary including, as applicable:<br><b>Background:</b> main objectives<br><b>Methods:</b> data sources; study eligibility criteria, participants, and interventions; study appraisal; and <i>synthesis methods, such as network meta-analysis</i> .<br><b>Results:</b> number of studies and participants identified; summary estimates with corresponding confidence/credible intervals; <i>treatment rankings may also be discussed. Authors may choose to summarize pairwise comparisons against a chosen treatment included in their analyses for brevity.</i><br><b>Discussion/Conclusions:</b> limitations; conclusions and implications of findings.<br><b>Other:</b> primary source of funding; systematic review registration number with registry name. | 2                  |
| <b>INTRODUCTION</b>       |        |                                                                                                                                                                                                                                                                                                                                                                                                                                                                                                                                                                                                                                                                                                                                                                                         |                    |
| Rationale                 | 3      | Describe the rationale for the review in the context of what is already known, <i>including mention of why a network meta-analysis has been conducted</i> .                                                                                                                                                                                                                                                                                                                                                                                                                                                                                                                                                                                                                             | 3-4                |
| Objectives                | 4      | Provide an explicit statement of questions being addressed, with reference to participants, interventions, comparisons, outcomes, and study design (PICOS).                                                                                                                                                                                                                                                                                                                                                                                                                                                                                                                                                                                                                             | 4                  |
| <b>METHODS</b>            |        |                                                                                                                                                                                                                                                                                                                                                                                                                                                                                                                                                                                                                                                                                                                                                                                         |                    |
| Protocol and registration | 5      | Indicate whether a review protocol exists and if and where it can be accessed (e.g., Web address); and, if available, provide registration information, including registration number.                                                                                                                                                                                                                                                                                                                                                                                                                                                                                                                                                                                                  | NA                 |
| Eligibility criteria      | 6      | Specify study characteristics (e.g., PICOS, length of follow-up) and report characteristics (e.g., years considered, language, publication status) used as criteria for eligibility, giving rationale. <i>Clearly describe eligible treatments included in the treatment network, and note whether any</i>                                                                                                                                                                                                                                                                                                                                                                                                                                                                              | 4-5                |

|                                        |           |                                                                                                                                                                                                                                                                                                                                                                                                                        |     |
|----------------------------------------|-----------|------------------------------------------------------------------------------------------------------------------------------------------------------------------------------------------------------------------------------------------------------------------------------------------------------------------------------------------------------------------------------------------------------------------------|-----|
|                                        |           | <i>have been clustered or merged into the same node (with justification).</i>                                                                                                                                                                                                                                                                                                                                          |     |
| Information sources                    | 7         | Describe all information sources (e.g., databases with dates of coverage, contact with study authors to identify additional studies) in the search and date last searched.                                                                                                                                                                                                                                             | 4-5 |
| Search                                 | 8         | Present full electronic search strategy for at least one database, including any limits used, such that it could be repeated.                                                                                                                                                                                                                                                                                          | 5   |
| Study selection                        | 9         | State the process for selecting studies (i.e., screening, eligibility, included in systematic review, and, if applicable, included in the meta-analysis).                                                                                                                                                                                                                                                              | 5   |
| Data collection process                | 10        | Describe method of data extraction from reports (e.g., piloted forms, independently, in duplicate) and any processes for obtaining and confirming data from investigators.                                                                                                                                                                                                                                             | 5-6 |
| Data items                             | 11        | List and define all variables for which data were sought (e.g., PICOS, funding sources) and any assumptions and simplifications made.                                                                                                                                                                                                                                                                                  | 5-6 |
| <b>Geometry of the network</b>         | <b>S1</b> | Describe methods used to explore the geometry of the treatment network under study and potential biases related to it. This should include how the evidence base has been graphically summarized for presentation, and what characteristics were compiled and used to describe the evidence base to readers.                                                                                                           | 5-6 |
| Risk of bias within individual studies | 12        | Describe methods used for assessing risk of bias of individual studies (including specification of whether this was done at the study or outcome level), and how this information is to be used in any data synthesis.                                                                                                                                                                                                 | 5-6 |
| Summary measures                       | 13        | State the principal summary measures (e.g., risk ratio, difference in means). <i>Also describe the use of additional summary measures assessed, such as treatment rankings and surface under the cumulative ranking curve (SUCRA) values, as well as modified approaches used to present summary findings from meta-analyses.</i>                                                                                      | 6   |
| Planned methods of analysis            | 14        | Describe the methods of handling data and combining results of studies for each network meta-analysis. This should include, but not be limited to: <ul style="list-style-type: none"> <li>• <i>Handling of multi-arm trials;</i></li> <li>• <i>Selection of variance structure;</i></li> <li>• <i>Selection of prior distributions in Bayesian analyses; and</i></li> <li>• <i>Assessment of model fit.</i></li> </ul> | 6-7 |
| <b>Assessment of Inconsistency</b>     | <b>S2</b> | Describe the statistical methods used to evaluate the agreement of direct and indirect evidence in the treatment network(s) studied. Describe efforts taken to address its presence when found.                                                                                                                                                                                                                        | 6-7 |
| Risk of bias across studies            | 15        | Specify any assessment of risk of bias that may affect the cumulative evidence (e.g., publication                                                                                                                                                                                                                                                                                                                      | 6-7 |

|                                          |           |                                                                                                                                                                                                                                                                                                                                                                                                                                                              |      |
|------------------------------------------|-----------|--------------------------------------------------------------------------------------------------------------------------------------------------------------------------------------------------------------------------------------------------------------------------------------------------------------------------------------------------------------------------------------------------------------------------------------------------------------|------|
|                                          |           | bias, selective reporting within studies).                                                                                                                                                                                                                                                                                                                                                                                                                   |      |
| Additional analyses                      | 16        | Describe methods of additional analyses if done, indicating which were pre-specified. This may include, but not be limited to, the following: <ul style="list-style-type: none"> <li>• Sensitivity or subgroup analyses;</li> <li>• Meta-regression analyses;</li> <li>• <i>Alternative formulations of the treatment network; and</i></li> <li>• <i>Use of alternative prior distributions for Bayesian analyses (if applicable).</i></li> </ul>            | 7    |
| <b>RESULTS†</b>                          |           |                                                                                                                                                                                                                                                                                                                                                                                                                                                              |      |
| Study selection                          | 17        | Give numbers of studies screened, assessed for eligibility, and included in the review, with reasons for exclusions at each stage, ideally with a flow diagram.                                                                                                                                                                                                                                                                                              | 7-8  |
| <b>Presentation of network structure</b> | <b>S3</b> | Provide a network graph of the included studies to enable visualization of the geometry of the treatment network.                                                                                                                                                                                                                                                                                                                                            | 9-11 |
| <b>Summary of network geometry</b>       | <b>S4</b> | Provide a brief overview of characteristics of the treatment network. This may include commentary on the abundance of trials and randomized patients for the different interventions and pairwise comparisons in the network, gaps of evidence in the treatment network, and potential biases reflected by the network structure.                                                                                                                            | 9-11 |
| Study characteristics                    | 18        | For each study, present characteristics for which data were extracted (e.g., study size, PICOS, follow-up period) and provide the citations.                                                                                                                                                                                                                                                                                                                 | 8    |
| Risk of bias within studies              | 19        | Present data on risk of bias of each study and, if available, any outcome level assessment.                                                                                                                                                                                                                                                                                                                                                                  | 8    |
| Results of individual studies            | 20        | For all outcomes considered (benefits or harms), present, for each study: 1) simple summary data for each intervention group, and 2) effect estimates and confidence intervals. <i>Modified approaches may be needed to deal with information from larger networks.</i>                                                                                                                                                                                      | 9-11 |
| Synthesis of results                     | 21        | Present results of each meta-analysis done, including confidence/credible intervals. <i>In larger networks, authors may focus on comparisons versus a particular comparator (e.g. placebo or standard care), with full findings presented in an appendix. League tables and forest plots may be considered to summarize pairwise comparisons.</i> If additional summary measures were explored (such as treatment rankings), these should also be presented. | 9-11 |
| <b>Exploration for inconsistency</b>     | <b>S5</b> | Describe results from investigations of inconsistency. This may include such information as measures of model fit to compare consistency                                                                                                                                                                                                                                                                                                                     | 11   |

|                                |    |                                                                                                                                                                                                                                                                                                                                                                                                                                |       |
|--------------------------------|----|--------------------------------------------------------------------------------------------------------------------------------------------------------------------------------------------------------------------------------------------------------------------------------------------------------------------------------------------------------------------------------------------------------------------------------|-------|
|                                |    | and inconsistency models, <i>P</i> values from statistical tests, or summary of inconsistency estimates from different parts of the treatment network.                                                                                                                                                                                                                                                                         |       |
| Risk of bias across studies    | 22 | Present results of any assessment of risk of bias across studies for the evidence base being studied.                                                                                                                                                                                                                                                                                                                          | 11    |
| Results of additional analyses | 23 | Give results of additional analyses, if done (e.g., sensitivity or subgroup analyses, meta-regression analyses, <i>alternative network geometries studied, alternative choice of prior distributions for Bayesian analyses</i> , and so forth).                                                                                                                                                                                | 11    |
| <b>DISCUSSION</b>              |    |                                                                                                                                                                                                                                                                                                                                                                                                                                |       |
| Summary of evidence            | 24 | Summarize the main findings, including the strength of evidence for each main outcome; consider their relevance to key groups (e.g., healthcare providers, users, and policy-makers).                                                                                                                                                                                                                                          | 11-16 |
| Limitations                    | 25 | Discuss limitations at study and outcome level (e.g., risk of bias), and at review level (e.g., incomplete retrieval of identified research, reporting bias). <i>Comment on the validity of the assumptions, such as transitivity and consistency. Comment on any concerns regarding network geometry (e.g., avoidance of certain comparisons).</i>                                                                            | 16    |
| Conclusions                    | 26 | Provide a general interpretation of the results in the context of other evidence, and implications for future research.                                                                                                                                                                                                                                                                                                        | 16-17 |
| <b>FUNDING</b>                 |    |                                                                                                                                                                                                                                                                                                                                                                                                                                |       |
| Funding                        | 27 | Describe sources of funding for the systematic review and other support (e.g., supply of data); role of funders for the systematic review. This should also include information regarding whether funding has been received from manufacturers of treatments in the network and/or whether some of the authors are content experts with professional conflicts of interest that could affect use of treatments in the network. | NA    |

PICOS = population, intervention, comparators, outcomes, study design.

\* Text in italics indicateS wording specific to reporting of network meta-analyses that has been added to guidance from the PRISMA statement.

† Authors may wish to plan for use of appendices to present all relevant information in full detail for items in this section.



**Table S2: Electronic search strategies**

| <b>Embase</b> (between January 1, 2000 and April 1, 2017)                                                                                                                                                                                                                                                                                                                                                                                                                                                                                                                                                                                                                                                                                                                                                                                                                                                                                                                                                   | <b>PubMed</b> (between January 1, 2000 and April 1, 2017)                                                                                                                                                                                                                                                                                                                                                                                                                                                                                                                                                                                                                                                                                                                                                                                                                                                                                                                                                                        | <b>Cochrane Central Register of Controlled Trials</b> (Publication Year from 2000 to 2017, in Trials)                                                                                                                                                                                                                                                                                                                                                                                                                                                                                                                                                                                                                                                                                                                                                                                                                                                                                                                                        |
|-------------------------------------------------------------------------------------------------------------------------------------------------------------------------------------------------------------------------------------------------------------------------------------------------------------------------------------------------------------------------------------------------------------------------------------------------------------------------------------------------------------------------------------------------------------------------------------------------------------------------------------------------------------------------------------------------------------------------------------------------------------------------------------------------------------------------------------------------------------------------------------------------------------------------------------------------------------------------------------------------------------|----------------------------------------------------------------------------------------------------------------------------------------------------------------------------------------------------------------------------------------------------------------------------------------------------------------------------------------------------------------------------------------------------------------------------------------------------------------------------------------------------------------------------------------------------------------------------------------------------------------------------------------------------------------------------------------------------------------------------------------------------------------------------------------------------------------------------------------------------------------------------------------------------------------------------------------------------------------------------------------------------------------------------------|----------------------------------------------------------------------------------------------------------------------------------------------------------------------------------------------------------------------------------------------------------------------------------------------------------------------------------------------------------------------------------------------------------------------------------------------------------------------------------------------------------------------------------------------------------------------------------------------------------------------------------------------------------------------------------------------------------------------------------------------------------------------------------------------------------------------------------------------------------------------------------------------------------------------------------------------------------------------------------------------------------------------------------------------|
| <p>#1 'hydroxymethylglutaryl-coa reductase inhibitors'/exp<br/>           #2 'statin'/exp OR 'statin':ab,ti<br/>           #3 'atorvastatin':ab,ti<br/>           #4 'fluvastatin':ab,ti<br/>           #5 'lovastatin':ab,ti<br/>           #6 'pitavastatin':ab,ti<br/>           #7 'pravastatin':ab,ti<br/>           #8 'rosuvastatin':ab,ti<br/>           #9 'simvastatin':ab,ti<br/>           #10 'ezetimibe':ab,ti<br/>           #11 'ezetimib':ab,ti<br/>           #12 'ezetrol':ab,ti<br/>           #13 'zetia':ab,ti<br/>           #14 'pcsk9':ab,ti<br/>           #15 'evolocumab':ab,ti<br/>           #16 'amg 145':ab,ti<br/>           #17 'alirocumab':ab,ti<br/>           #18 'regn727':ab,ti<br/>           #19 'sar236553':ab,ti<br/>           #20 #1 OR #2 OR #3 OR #4 OR #5 OR #6 OR #7 OR #8 OR #9 OR #10 OR #11 OR #12 OR #13 OR #14 OR #15 OR #116 OR #17 OR #18 OR #19<br/>           #21 'hypercholesterolemia'/exp<br/>           #22 'hypercholesterolemia':ab,ti</p> | <p>#1 "hydroxymethylglutaryl-coa reductase inhibitors"[mesh]<br/>           #2 "ezetimibe"[mesh]<br/>           #3 "AMG 145"[supplementary concept]<br/>           #4 "alirocumab"[supplementary concept]<br/>           #5 "statin"[tiab]<br/>           #6 "atorvastatin"[tiab]<br/>           #7 "fluvastatin"[tiab]<br/>           #8 "lovastatin"[tiab]<br/>           #9 "pitavastatin"[tiab]<br/>           #10 "pravastatin"[tiab]<br/>           #11 "rosuvastatin"[tiab]<br/>           #12 "simvastatin"[tiab]<br/>           #13 "ezetimibe"[tiab]<br/>           #14 "ezetimib"[tiab]<br/>           #15 "ezetrol"[tiab]<br/>           #16 "zetia"[tiab]<br/>           #17 "PCSK9"[tiab]<br/>           #18 "evolocumab"[tiab]<br/>           #19 "AMG 145"[tiab]<br/>           #20 "alirocumab"[tiab]<br/>           #21 "REGN727"[tiab]<br/>           #22 "SAR236553"[tiab]<br/>           #23 #1 OR #2 OR #3 OR #4 OR #5 OR #6 OR #7 OR #8 OR #9 OR #10 OR #11 OR #12 OR #13 OR #14 OR #15 OR #16 OR #17</p> | <p>#1 MeSH descriptor: [Hydroxymethylglutaryl-CoA Reductase Inhibitors] explode all trees<br/>           #2 MeSH descriptor: [Ezetimibe] explode all trees<br/>           #3 AMG 145:ti,ab,kw<br/>           #4 alirocumab:ti,ab,kw<br/>           #5 statin:ti,ab,kw<br/>           #6 atorvastatin:ti,ab,kw<br/>           #7 fluvastatin:ti,ab,kw<br/>           #8 lovastatin:ti,ab,kw<br/>           #9 pitavastatin:ti,ab,kw<br/>           #10 pravastatin:ti,ab,kw<br/>           #11 rosuvastatin:ti,ab,kw<br/>           #12 simvastatin:ti,ab,kw<br/>           #13 ezetimibe:ti,ab,kw<br/>           #14 ezetimib:ti,ab,kw<br/>           #15 ezetrol:ti,ab,kw<br/>           #16 zetia:ti,ab,kw<br/>           #17 PCSK9:ti,ab,kw<br/>           #18 evolocumab:ti,ab,kw<br/>           #19 AMG 145:ti,ab,kw<br/>           #20 alirocumab:ti,ab,kw<br/>           #21 REGN727:ti,ab,kw<br/>           #22 SAR236553:ti,ab,kw<br/>           #23 #1 OR #2 OR #3 OR #4 OR #5 OR #6 OR #7 OR #8 OR #9 OR #10 OR #11 OR #12 OR</p> |

|                                                                                                                                                                                                                                                                                                                                                                                                                                                                                                                                                                                                                                                                                                                                                                                                        |                                                                                                                                                                                                                                                                                                                                                                                                                                                                                                                                                                                                                                                                                                                                                                                                                                                                                                                                                         |                                                                                                                                                                                                                                                                                                                                                                                                                                                                                                                                                                                 |
|--------------------------------------------------------------------------------------------------------------------------------------------------------------------------------------------------------------------------------------------------------------------------------------------------------------------------------------------------------------------------------------------------------------------------------------------------------------------------------------------------------------------------------------------------------------------------------------------------------------------------------------------------------------------------------------------------------------------------------------------------------------------------------------------------------|---------------------------------------------------------------------------------------------------------------------------------------------------------------------------------------------------------------------------------------------------------------------------------------------------------------------------------------------------------------------------------------------------------------------------------------------------------------------------------------------------------------------------------------------------------------------------------------------------------------------------------------------------------------------------------------------------------------------------------------------------------------------------------------------------------------------------------------------------------------------------------------------------------------------------------------------------------|---------------------------------------------------------------------------------------------------------------------------------------------------------------------------------------------------------------------------------------------------------------------------------------------------------------------------------------------------------------------------------------------------------------------------------------------------------------------------------------------------------------------------------------------------------------------------------|
| <p>#23 'hypercholesterolaemia':ab,ti<br/> #24 'hypercholesteremia':ab,ti<br/> #25 'hyperlipidaemia':ab,ti<br/> #26 'dyslipidaemia':ab,ti<br/> #27 'elevated cholesterol':ab,ti<br/> #28 #21 OR #22 OR #23 OR #24 OR #25 OR #26 OR #27<br/> #29 'randomized controlled trial'/exp<br/> #30 'randomized controlled trial (topic)'/exp<br/> #31 'controlled clinical trial (topic)'/exp<br/> #32 'randomized controlled trial':ab,ti<br/> #33 'random':ab,ti OR 'randomized':ab,ti<br/> #34 'double blind method':ab,ti OR 'triple blind method':ab,ti<br/> #35 'placebo':ab,ti OR 'placebos':ab,ti OR 'control':ab,ti OR 'controlled':ab,ti<br/> #36 #33 AND #34 AND #35<br/> #37 #29 OR #30 OR #31 OR #32 OR #36<br/> #38 #20 AND #28 AND #37 AND [humans]/lim NOT [1-4-2017]/sd AND [2000-2017]/py</p> | <p>OR #18 OR #19 OR #20 OR #21 OR #22<br/> #24 "hypercholesterolemia"[mesh]<br/> #25 "hypercholesterolemia"[tiab]<br/> #26 "hypercholesterolaemia"[tiab]<br/> #27 "hypercholesteremia"[tiab]<br/> #28 "hyperlipidaemia"[tiab]<br/> #29 "dyslipidaemia"[tiab]<br/> #30 "elevated cholesterol"[tiab]<br/> #31 #24 OR #25 OR #26 OR #27 OR #28 OR #29 OR #30 OR #31<br/> #31 "randomized controlled trial"[publication type]<br/> #32 "randomized controlled trials as topic"[mesh]<br/> #33 "controlled clinical trial"[publication type]<br/> #34 "randomized"[tiab] OR "random\$"[tiab]<br/> #35 "double blind method"[tiab] OR "single blind method"[tiab] OR "triple blind method"[tiab]<br/> #36 "placebo"[tiab] OR "placebos"[tiab] OR "control"[tiab] OR "controlled"[tiab]<br/> #37 #34 AND #35 AND #36<br/> #38 #31 OR #32 OR #33 OR #37<br/> #39 #23 AND #31 AND #38 AND ("2000/01/01"[PDAT] : "2017/04/01"[PDAT]) AND "humans"[MeSH Terms]</p> | <p>#13 OR #14 OR #15 OR #16 OR #17 OR #18 OR #19 OR #20 OR #21<br/> #24 MeSH descriptor: [Hypercholesterolemia] explode all trees<br/> #25 hypercholesterolemia:ti,ab,kw<br/> #26 hypercholesterolaemia:ti,ab,kw<br/> #27 hypercholesteremia:ti,ab,kw<br/> #28 hyperlipidaemia:ti,ab,kw<br/> #29 dyslipidaemia:ti,ab,kw<br/> #30 elevated cholesterol:ti,ab,kw<br/> #31 #23 OR #24 OR #25 OR #26 OR #27 OR #28 OR #29<br/> #32 randomized controlled trial:pt<br/> #33 controlled clinical trial:pt<br/> #34 RCT:pt<br/> #35 #32 OR #33 OR #34<br/> #36 #23 AND #31 AND #35</p> |
|--------------------------------------------------------------------------------------------------------------------------------------------------------------------------------------------------------------------------------------------------------------------------------------------------------------------------------------------------------------------------------------------------------------------------------------------------------------------------------------------------------------------------------------------------------------------------------------------------------------------------------------------------------------------------------------------------------------------------------------------------------------------------------------------------------|---------------------------------------------------------------------------------------------------------------------------------------------------------------------------------------------------------------------------------------------------------------------------------------------------------------------------------------------------------------------------------------------------------------------------------------------------------------------------------------------------------------------------------------------------------------------------------------------------------------------------------------------------------------------------------------------------------------------------------------------------------------------------------------------------------------------------------------------------------------------------------------------------------------------------------------------------------|---------------------------------------------------------------------------------------------------------------------------------------------------------------------------------------------------------------------------------------------------------------------------------------------------------------------------------------------------------------------------------------------------------------------------------------------------------------------------------------------------------------------------------------------------------------------------------|

**Table S3. Basic characteristics of included trials.**

| Publication year, Study ID          | Setting       | Lipid-lowering therapies   | No. of patients | Follow-up (year) | Age (mean) | HP history % | DM % | CAD history % | LDL (mg/dL) | HDL (mg/dL) | TG (mg/dL) | Baseline lipid-lowering therapies |
|-------------------------------------|---------------|----------------------------|-----------------|------------------|------------|--------------|------|---------------|-------------|-------------|------------|-----------------------------------|
| <b>Statins-related trials</b>       |               |                            |                 |                  |            |              |      |               |             |             |            |                                   |
| 2000, SCAT <sup>1</sup>             | Multi-center  | Simvastatin                | 460             | 4                | 61         | 36           | 11   | 100           | 130         | 38          | 160        | Diet therapies                    |
| 2000, GISSI Prevention <sup>2</sup> | Multi-center  | Pravastatin                | 4,271           | 2                | 60         | 37           | 14   | 100           | 152         | 46          | 155        | Diet therapies                    |
| 2002, LIPS <sup>3</sup>             | Multi-center  | Fluvastatin                | 1,677           | 3.9              | 60         | 39           | 12   | 100           | 132         | 38          | 150        | Dietary and lifestyle counseling  |
| 2002, FAST <sup>4</sup>             | Single center | Pravastatin                | 164             | 2                | 66.1       | 40           | 56   | NR            | 166         | 57          | 150        | Diet therapies                    |
| 2002, ALLHAT-LLT <sup>5</sup>       | Multi-center  | Pravastatin                | 10,355          | 6                | 66.4       | 100          | 35.1 | 14.2          | 146         | 48          | 150        | Usual care                        |
| 2002, GREACE <sup>6</sup>           | Multi-center  | Atorvastatin               | 1,600           | 3                | 58.5       | 43           | 19.5 | 100           | 180         | 41          | 181        | Usual care included life-style    |
| 2002, Davidson et al. <sup>7</sup>  | Multi-center  | Rosuvastatin, Atorvastatin | 516             | 0.2              | 57         | NR           | NR   | NR            | 186         | 50          | 190        | Diet therapies                    |
| 2002, MRC/BHF <sup>8</sup>          | Multi-center  | Simvastatin                | 20,536          | 5                | NR         | 41           | 19.4 | 80.6          | 132         | 41          | 280        | NR                                |
| 2002, PROSPER <sup>9</sup>          | Multi-        | Pravastatin                | 5,804           | 3.2              | 75.3       | 61.9         | 10.7 | NR            | 147         | 50          | 120        | NR                                |

|                                     |               |                           |        |     |      |      |      |     |     |    |     |                                                                          |
|-------------------------------------|---------------|---------------------------|--------|-----|------|------|------|-----|-----|----|-----|--------------------------------------------------------------------------|
|                                     | center        |                           |        |     |      |      |      |     |     |    |     |                                                                          |
| 2003, ASCOT-LLA <sup>10</sup>       | Multi-center  | Atorvastatin              | 19,342 | 3.3 | 63.1 | 100  | 13.1 | 9.9 | 132 | 50 | 155 | NR                                                                       |
| 2003, Bruckert et al. <sup>11</sup> | Multi-center  | Fluvastatin               | 1,229  | 0.5 | 75.5 | 56   | 7    | NR  | 200 | 53 | 140 | Diet therapies                                                           |
| 2004, PREVENT IT <sup>12</sup>      | Single center | Pravastatin               | 864    | 4   | 51.3 | NR   | 2.5  | NR  | 155 | 39 | 155 | NR                                                                       |
| 2004, ALLIANCE <sup>13</sup>        | Multi-center  | Atorvastatin              | 2,442  | 4.3 | 61.2 | NR   | 22.2 | 100 | 147 | 41 | 190 | Usual care included life-style                                           |
| 2004, JUST <sup>14</sup>            | Multi-center  | Simvastatin               | 299    | 2   | 58.7 | 54.8 | 43.5 | 100 | 154 | 45 | 165 | Diet therapies                                                           |
| 2004, PHYLLIS <sup>15</sup>         | Multi-center  | Pravastatin               | 508    | 2.6 | 58.4 | 100  | NR   | 100 | 181 | 53 | 140 | Low lipid diet                                                           |
| 2004, CARDS <sup>16</sup>           | Multi-center  | Atorvastatin              | 2,838  | 3.9 | 61.7 | 84   | 100  | 0   | 117 | 55 | 175 | Additional lipid-lowering treatment on the top of study drug was allowed |
| 2004, PROVE-IT <sup>17</sup>        | Multi-center  | Pravastatin, Atorvastatin | 4,162  | 2   | 58.2 | 50.2 | 16.7 | 100 | 106 | 39 | 180 | Statins were prescribed both in experimental and control group.          |
| 2004, A to Z <sup>18</sup>          | Multi-center  | Simvastatin               | 4,497  | 2   | 61   | 49.7 | 23.8 | 100 | 112 | 39 | 170 | Statins were prescribed both in experimental and control group.          |

|                              |               |                                  |        |     |      |      |      |      |     |    |     |                                                                 |
|------------------------------|---------------|----------------------------------|--------|-----|------|------|------|------|-----|----|-----|-----------------------------------------------------------------|
| 2005, TNT <sup>19</sup>      | Multi-center  | Atorvastatin                     | 10,001 | 4.9 | 61   | 54.1 | 15   | 100  | 98  | 47 | 150 | Statins were prescribed both in experimental and control group. |
| 2005, IDEAL <sup>20</sup>    | Multi-center  | Atorvastatin<br>,<br>Simvastatin | 8,888  | 4.8 | 61.7 | 33   | 12   | 100  | 122 | 46 | 140 | Statins were prescribed both in experimental and control group. |
| 2005, CERDIA <sup>21</sup>   | Single center | Cerivastatin                     | 250    | 2   | 58.5 | 50.4 | 100  | 0    | 132 | 48 | 162 | NR                                                              |
| 2005, COMETS <sup>22</sup>   | Multi-center  | Rosuvastatin,<br>Atorvastatin    | 397    | 0.1 | 57.7 | NR   | 0    | 0    | 169 | 60 | 115 | Diet therapies                                                  |
| 2005, MARS <sup>23</sup>     | Multi-center  | Lovastatin                       | 270    | 2   | 58   | 0    | NR   | 100  | 153 | 43 | 180 | Diet therapies                                                  |
| 2005, ATHEROMA <sup>24</sup> | Multi-center  | Pravastatin                      | 361    | 3   | 59.3 | 42   | 18.8 | 100  | 143 | 50 | 165 | Diet therapies                                                  |
| 2006, ASPEN <sup>25</sup>    | Multi-center  | Atorvastatin                     | 2,410  | 4   | 61.1 | 55   | 100  | NR   | 114 | 47 | 165 | Diet therapies                                                  |
| 2007, HYRIM <sup>26</sup>    | Single center | Fluvastatin                      | 568    | 4   | 57.2 | 100  | NR   | NR   | 150 | 49 | 155 | Intensive lifestyle intervention or usual care                  |
| 2008, JUPITER <sup>27</sup>  | Multi-center  | Rosuvastatin                     | 17,802 | 1.9 | 66   | 57.3 | 0    | 11.5 | 108 | 49 | 145 | NR                                                              |
| 2009, RCASS <sup>28</sup>    | Multi-        | Simvastatin                      | 227    | 2   | 63   | 69.2 | 91.2 | 100  | 151 | 45 | 165 | NR                                                              |

|                                        |              |                         |        |     |      |      |      |     |     |    |     |                                                                             |
|----------------------------------------|--------------|-------------------------|--------|-----|------|------|------|-----|-----|----|-----|-----------------------------------------------------------------------------|
|                                        | center       |                         |        |     |      |      |      |     |     |    |     |                                                                             |
| 2009, MEGA <sup>29</sup>               | Multi-center | Pravastatin             | 3,277  | 5   | 58.5 | 100  | 20.5 | 0   | 159 | 58 | 135 | Diet therapies                                                              |
| 2010, SEARCH <sup>30</sup>             | Multi-center | Simvastatin             | 12,064 | 6.7 | 64.2 | 42   | 11   | 100 | 97  | 40 | 335 | Statins were prescribed both in experimental and control group.             |
| 2010, ASTRONOMER <sup>31</sup>         | Multi-center | Rosuvastatin            | 269    | 3.5 | 58   | 28   | 0    | 0   | 122 | 61 | 110 | NR                                                                          |
| 2010, METEOR <sup>32</sup>             | Multi-center | Rosuvastatin            | 984    | 2   | 57   | 19.9 | NR   | 10  | 155 | 50 | 120 | NR                                                                          |
| 2016, HOPE3 <sup>33</sup>              | Multi-center | Rosuvastatin            | 12,705 | 5.6 | 65.8 | 37.9 | 5.8  | 0   | 128 | 45 | 140 | Individualized structured lifestyle advice was provided to the participants |
| <b>Ezetimibe-related trials</b>        |              |                         |        |     |      |      |      |     |     |    |     |                                                                             |
| 2002, Davidson MH et al. <sup>34</sup> | Multi-center | Ezetimibe, Simvastatin  | 394    | 0.2 | 57.4 | NR   | 4.6  | NR  | 179 | 51 | 175 | Diet therapies                                                              |
| 2002, Dujovne et al. <sup>35</sup>     | Multi-center | Ezetimibe               | 892    | 0.2 | 58   | 33.3 | NR   | NR  | 167 | 52 | 170 | Diet therapies                                                              |
| 2003, Ballantyne et al. <sup>36</sup>  | Multi-center | Ezetimibe, Atorvastatin | 373    | 0.2 | 57.5 | 34   | 3.5  | 9   | 180 | 53 | 170 | Diet therapies                                                              |
| 2003, Kerzner et                       | Multi-       | Ezetimibe,              | 356    | 0.2 | 56.2 | 30.9 | 6.5  | 7   | 179 | 52 | 170 | Diet therapies                                                              |

|                                           |              |                        |     |     |      |      |      |      |     |    |     |                          |
|-------------------------------------------|--------------|------------------------|-----|-----|------|------|------|------|-----|----|-----|--------------------------|
| al. <sup>37</sup>                         | center       | Lovastatin             |     |     |      |      |      |      |     |    |     |                          |
| 2003, Knopp et al. <sup>38</sup>          | Multi-center | Ezetimibe              | 827 | 0.2 | 58.1 | 34.7 | 5.7  | 6.8  | 157 | 52 | 200 | Diet therapies           |
| 2003, Melani et al. <sup>39</sup>         | Multi-center | Ezetimibe, Pravastatin | 334 | 0.2 | 54.2 | 29.6 | 5.1  | 6    | 178 | 50 | 180 | Diet therapies           |
| 2004, Bays et al. <sup>40</sup>           | Multi-center | Ezetimibe, Simvastatin | 919 | 0.2 | 55.2 | 36.7 | 5.7  | 14.5 | 178 | 52 | 160 | Diet therapies           |
| 2004, Feldman et al. <sup>41</sup>        | Multi-center | Ezetimibe              | 362 | 0.4 | 63   | NR   | 47.8 | 52.2 | 172 | 46 | 180 | Lipid-lowering therapies |
| 2004, Goldberg et al. <sup>42</sup>       | Multi-center | Ezetimibe, Simvastatin | 534 | 0.2 | NR   | 31.2 | 5.6  | 6.8  | 175 | 50 | 170 | Diet therapies           |
| 2005, Cruz-Fernandez et al. <sup>43</sup> | Multi-center | Ezetimibe              | 450 | 0.2 | 63.2 | 55.8 | 17.5 | 100  | 122 | 52 | 150 | Lipid-lowering therapies |
| 2005, Masana et al. <sup>44</sup>         | Multi-center | Ezetimibe              | 433 | 1   | 59.4 | NR   | NR   | NR   | 136 | 50 | 145 | Lipid-lowering therapies |
| 2006, Patel et al. <sup>45</sup>          | Multi-center | Ezetimibe              | 152 | 0.1 | 65.4 | 45.4 | 3.9  | 100  | 169 | 54 | 40  | Lipid-lowering therapies |
| 2006, UK-HARP-II <sup>46</sup>            | Multi-center | Ezetimibe, Simvastatin | 203 | 0.5 | 60.0 | NR   | 10.8 | NR   | 119 | 40 | 190 | Lipid-lowering therapies |
| 2007, Shankar et al. <sup>47</sup>        | Multi-center | Ezetimibe              | 230 | 0.2 | 51.9 | 33.9 | NR   | 73.9 | 128 | 42 | 460 | Lipid-lowering therapies |
| 2008, ENHANCE <sup>48</sup>               | Multi-center | Ezetimibe              | 720 | 1   | 45.9 | 16.4 | 1.8  | NR   | 318 | 47 | 175 | Lipid-lowering therapies |
| 2008, Strony et al. <sup>49</sup>         | Multi-center | Ezetimibe              | 109 | 1   | 57.3 | 29.4 | 5.5  | NR   | 178 | 49 | 180 | Lipid-lowering therapies |

|                                        |               |                         |        |     |      |      |      |      |     |    |     |                                  |
|----------------------------------------|---------------|-------------------------|--------|-----|------|------|------|------|-----|----|-----|----------------------------------|
| 2012, Arimura <sup>50</sup>            | Single center | Atorvastatin, Ezetimibe | 50     | 0.5 | 68   | 75   | 30   | NR   | 100 | 50 | 150 | Lipid-lowering therapies         |
| 2015, IMPROVE-IT <sup>51</sup>         | Multi-center  | Ezetimibe, Simvastatin  | 18,144 | 6   | 63.6 | 61.4 | 27.2 | 100  | 94  | NR | NR  | Lipid-lowering therapies         |
| 2015, Masuda <sup>52</sup>             | Single center | Rosuvastatin, Ezetimibe | 51     | 0.5 | 67.1 | 75   | 47.5 | 40   | 127 | 50 | 110 | Lipid-lowering therapies         |
| 2015, PRECISE - IVUS <sup>53</sup>     | Multi-center  | Atorvastatin, Ezetimibe | 202    | 1   | 66.5 | 70.3 | 29.7 | 49   | 109 | 41 | 125 | Lipid-lowering therapies         |
| 2016, Wang <sup>54</sup>               | Single center | Rosuvastatin, Ezetimibe | 98     | 1   | 64   | 49   | 35.7 | 56.1 | 137 | 44 | 70  | Lipid-lowering therapies         |
| 2016, HIJ-PROPER <sup>55</sup>         | Multi-center  | Ezetimibe, pitavastatin | 1,734  | 3.9 | 65.6 | NR   | NR   | 100  | 135 | NR | NR  | Lipid-lowering therapies         |
| <b>PCSK9 inhibitors-related trials</b> |               |                         |        |     |      |      |      |      |     |    |     |                                  |
| 2012, LAPLACE-TIMI 57 <sup>56</sup>    | Multi-center  | Evolocumab              | 315    | 0.2 | 63   | 70.2 | 17   | 32   | 122 | 54 | 125 | Lipid-lowering therapies         |
| 2012, MENDEL <sup>57</sup>             | Multi-center  | Evolocumab              | 225    | 0.2 | 51   | 32.9 | 0    | NR   | 143 | 53 | 125 | Without lipid-lowering therapies |
| 2012, McKenney et al. <sup>58</sup>    | Multi-center  | Alirocumab              | 62     | 0.2 | 56.6 | 48.4 | 6.5  | 6.5  | 127 | 51 | 140 | Lipid-lowering therapies         |
| 2012, RUTHERFORD <sup>59</sup>         | Multi-center  | Evolocumab              | 112    | 0.2 | 50.6 | NR   | NR   | 21.5 | 156 | 50 | 110 | Lipid-lowering therapies         |
| 2012, Roth et al. <sup>60</sup>        | Multi-        | Alirocumab              | 61     | 0.2 | 56.9 | 49.2 | 16.4 | 1.5  | 123 | 55 | 125 | Lipid-lowering                   |



|                                          |              |                       |       |     |      |      |      |      |     |    |     |                                  |
|------------------------------------------|--------------|-----------------------|-------|-----|------|------|------|------|-----|----|-----|----------------------------------|
|                                          | center       |                       |       |     |      |      |      |      |     |    |     | therapies                        |
| 2012, Stein et al. <sup>61</sup>         | Multi-center | Alirocumab            | 31    | 0.2 | 54   | NR   | 0    | 35.5 | 146 | 52 | 135 | Lipid-lowering therapies         |
| 2012, GAUSS <sup>62</sup>                | Multi-center | Evolocumab            | 65    | 0.2 | 61   | NR   | NR   | NR   | 194 | 57 | 155 | Lipid-lowering therapies         |
| 2014, DESCARTES <sup>63</sup>            | Multi-center | Evolocumab            | 901   | 1   | 56   | 48.6 | 11.5 | 15.1 | 104 | 53 | 105 | Lipid-lowering therapies         |
| 2014, YUKAWA <sup>64</sup>               | Multi-center | Evolocumab            | 207   | 0.2 | 61   | 72.9 | 35   | 27   | 139 | 54 | 145 | Lipid-lowering therapies         |
| 2014, MENDEL-2 <sup>65</sup>             | Multi-center | Evolocumab            | 614   | 0.2 | 53   | 28.7 | 0.2  | 0    | 143 | 55 | 115 | Without lipid-lowering therapies |
| 2014, LAPLACE-2 <sup>66</sup>            | Multi-center | Evolocumab, Ezetimibe | 1,897 | 0.2 | 60   | NR   | 15   | 23   | 109 | 54 | 130 | Lipid-lowering therapies         |
| 2014, GAUSS-2 <sup>67</sup>              | Multi-center | Evolocumab            | 307   | 0.2 | 62   | 59   | 20   | 29   | 193 | 52 | NR  | Lipid-lowering therapies         |
| 2015, ODYSSEY OPTIONS I <sup>68</sup>    | Multi-center | Alirocumab, Ezetimibe | 206   | 0.2 | 64   | 78.6 | NR   | NR   | 104 | NR | NR  | Lipid-lowering therapies         |
| 2015, ODYSSEY COMBO II <sup>69</sup>     | Multi-center | Alirocumab, Ezetimibe | 720   | 1   | 62   | NR   | 31   | 90   | 107 | 46 | 160 | Lipid-lowering therapies         |
| 2015, ODYSSEY FHI and FHII <sup>70</sup> | Multi-center | Alirocumab            | 735   | 1.5 | 52.4 | 39.6 | 8.2  | 42.6 | 139 | NR | NR  | Lipid-lowering therapies         |
| 2015, ODYSSEY COMBO I <sup>71</sup>      | Multi-center | Alirocumab            | 316   | 1   | 63   | NR   | 43.1 | 78.2 | 102 | 48 | NR  | Lipid-lowering therapies         |
| 2015, ODYSSEY                            | Multi-       | Alirocumab            | 314   | 0.5 | 63.5 | 62.7 | 23.9 | 47   | 192 | 50 | 153 | Without lipid-                   |

|                                                                           |              |                       |       |     |      |      |      |      |     |    |     |                                  |
|---------------------------------------------------------------------------|--------------|-----------------------|-------|-----|------|------|------|------|-----|----|-----|----------------------------------|
| ALTERNATIVE <sup>72</sup>                                                 | center       | , Ezetimibe           |       |     |      |      |      |      |     |    |     | lowering therapies               |
| 2015, RUTHERFORD-2 <sup>73</sup>                                          | Multi-center | Evolocumab            | 331   | 0.2 | 51.2 | NR   | NR   | 31.3 | 155 | 50 | 106 | Lipid-lowering therapies         |
| 2015, ODYSSEY LONG TERM <sup>74</sup>                                     | Multi-center | Alirocumab            | 2,341 | 1.5 | 63.5 | NR   | 23.9 | 47   | 122 | 50 | NR  | Lipid-lowering therapies         |
| 2015, ODYSSEY MONO <sup>75</sup>                                          | Multi-center | Alirocumab, Ezetimibe | 103   | 0.5 | 60.2 | NR   | 3.9  | NR   | 140 | 57 | 130 | Without lipid-lowering therapies |
| 2015, OSLER-1 (OSLER-1 extension) <sup>76</sup> and OSLER-2 <sup>77</sup> | Multi-center | Evolocumab            | 4,465 | 1   | 58   | 52   | 13   | 20   | 120 | 51 | 160 | Without lipid-lowering therapies |
| 2016, ODYSSEY OPTIONS II <sup>78</sup>                                    | Multi-center | Alirocumab, Ezetimibe | 204   | 0.5 | 60.9 | 71.1 | 39.7 | 56.9 | 112 | 51 | 129 | Lipid-lowering therapies         |
| 2016, YUKAWA-2 <sup>79</sup>                                              | Multi-center | Evolocumab            | 404   | 0.2 | 61.5 | 73.5 | 48.8 | 12.9 | 106 | 57 | 123 | Lipid-lowering therapies         |
| 2016, GAUSS-3 <sup>80</sup>                                               | Multi-center | Evolocumab, Ezetimibe | 218   | 0.5 | 58.8 | 51.4 | 11.9 | 31.7 | 220 | 50 | 185 | Without lipid-lowering therapies |
| 2016, ODYSSEY HIGH FH <sup>81</sup>                                       | Multi-center | Alirocumab            | 107   | 0.5 | 50.6 | 57   | 14   | 49.5 | 198 | 48 | 140 | Lipid-lowering therapies         |
| 2016, GLAGOV <sup>82</sup>                                                | Multi-center | Evolocumab, statins   | 968   | 1.5 | 59.8 | 83   | 20.9 | NR   | 93  | 46 | 125 | Lipid-lowering therapies         |

|                                         |              |                                           |        |     |      |      |      |     |     |    |     |                                                                      |
|-----------------------------------------|--------------|-------------------------------------------|--------|-----|------|------|------|-----|-----|----|-----|----------------------------------------------------------------------|
|                                         |              | combination                               |        |     |      |      |      |     |     |    |     |                                                                      |
| 2017, SPIRE <sup>83</sup>               | Multi-center | Bococizuma<br>b, statins<br>combination   | 4,449  | 1   | 61.3 | 78.3 | 53.3 | NR  | 122 | 48 | 160 | 96% were<br>receiving statin<br>therapy at the time<br>of enrollment |
| 2017, FOURIER <sup>84</sup>             | Multi-center | Evolocuma<br>b,<br>statins<br>combination | 27,564 | 2.2 | 62.5 | 80.1 | 36.6 | 100 | 92  | 44 | 135 | Lipid-lowering<br>therapies                                          |
| 2018, ODYSSEY<br>OUTCOMES <sup>85</sup> | Multi-center | Alirocuma,<br>statins<br>combination      | 18,924 | 2.8 | NA   | NA   | NA   | 100 | 87  | NA | NA  | Lipid-lowering<br>therapies                                          |

**Table S4. The tau values for the network meta-analyses for each outcome**

| <b>Outcomes</b>          | <b>Tau<sup>2</sup></b> | <b>Outcome type (all pharmacological versus pharmacological)</b> | <b>Predictive distributions for Tau<sup>2</sup></b>     | <b>The extent of heterogeneity</b> |
|--------------------------|------------------------|------------------------------------------------------------------|---------------------------------------------------------|------------------------------------|
| LDL Cholesterol          | 1.7432                 | <b>Biological marker</b>                                         | <b>Median = 0.033; 95% Range = 0.0001–10.2; N = 401</b> | Moderate                           |
| HDL Cholesterol          | 0.0707                 |                                                                  |                                                         | Moderate                           |
| Total Cholesterol        | 0.6027                 |                                                                  |                                                         | Moderate                           |
| All-cause mortality      | 0.0000                 | <b>All-cause mortality</b>                                       | <b>Median=0.014; 95% Range=(0.0008 –0.25)</b>           | Low                                |
| Cardiovascular events    | 0.0094                 | <b>Semi-objective outcomes</b>                                   | <b>Median=0.040; 95% Range=(0.001–1.58)</b>             | Low                                |
| Cardiovascular mortality | 0.0028                 |                                                                  |                                                         | Low                                |
| Serious adverse events   | 0.0000                 | <b>Subjective outcomes</b>                                       | <b>Median=0.096; 95% Range=(0.004–2.31)</b>             | Low                                |
| Neurocognitive events    | 0.0390                 |                                                                  |                                                         | Moderate                           |
| New-onset diabetes       | 0.0000                 |                                                                  |                                                         | Low                                |
| Alanine aminotransferase | 0.0801                 |                                                                  |                                                         | Moderate                           |
| Creatine kinase          | 0.0894                 |                                                                  |                                                         | Moderate                           |

**Table S5. Assessment of loop inconsistency in networks**

| Closed triangular of quadratic loop of evidence                                                                                       | Inconsistency factor<br>(95% confidence interval) | Loop heterogeneity tau2 |
|---------------------------------------------------------------------------------------------------------------------------------------|---------------------------------------------------|-------------------------|
| <b>LDL-C Cholesterol</b>                                                                                                              |                                                   |                         |
| Placebo- statin - Ezetimibe                                                                                                           | 0.33 (0.00,1.34)                                  | 0.735                   |
| Placebo - Ezetimibe - PCSK9 inhibitor                                                                                                 | 0.31 (0.00,1.86)                                  | 1.421                   |
| <b>HDL Cholesterol</b>                                                                                                                |                                                   |                         |
| Placebo- statin - Ezetimibe                                                                                                           | 0.12 (0.00,0.39)                                  | 0.042                   |
| Placebo - Ezetimibe - PCSK9 inhibitor                                                                                                 | 0.02 (0.00,0.36)                                  | 0.050                   |
| <b>TC Cholesterol</b>                                                                                                                 |                                                   |                         |
| Placebo- statin - Ezetimibe                                                                                                           | 0.39 (0.00,1.38)                                  | 0.673                   |
| Placebo - Ezetimibe - PCSK9 inhibitor                                                                                                 | 0.51 (0.00,2.23)                                  | 0.374                   |
| <b>All-cause Mortality</b>                                                                                                            |                                                   |                         |
| Placebo - Ezetimibe - PCSK9 inhibitor                                                                                                 | 1.41 (0.00, 2.97)                                 | 0.032                   |
| <b>Cardiovascular Events</b>                                                                                                          |                                                   |                         |
| Placebo - Ezetimibe - PCSK9 inhibitor                                                                                                 | 0.27 (0.00, 0.86)                                 | 0.000                   |
| <b>Cardiovascular Mortality</b>                                                                                                       |                                                   |                         |
| Placebo - Ezetimibe - PCSK9 inhibitor                                                                                                 | 0.83 (0.00, 2.51)                                 | 0.000                   |
| <b>Serious adverse events</b>                                                                                                         |                                                   |                         |
| Placebo- statin - Ezetimibe                                                                                                           | 0.68 (0.00,3.90)                                  | 0.000                   |
| Placebo - Ezetimibe - PCSK9 inhibitor                                                                                                 | 0.30 (0.00,0.81)                                  | 0.000                   |
| <b>Neurocognitive events</b>                                                                                                          |                                                   |                         |
| Placebo - Ezetimibe - PCSK9 inhibitor                                                                                                 | 1.70 (0.00,5.23)                                  | 0.167                   |
| <b>Alanine aminotransferase</b>                                                                                                       |                                                   |                         |
| Placebo- statin - Ezetimibe                                                                                                           | 0.38 (0.00,1.93)                                  | 0.161                   |
| Placebo - Ezetimibe - PCSK9 inhibitor                                                                                                 | 0.09 (0.00,1.08)                                  | 0.000                   |
| <b>Creatine kinase</b>                                                                                                                |                                                   |                         |
| Placebo- statin - Ezetimibe                                                                                                           | 0.82 (0.00,2.54)                                  | 0.131                   |
| Placebo - Ezetimibe - PCSK9 inhibitor                                                                                                 | 0.03 (0.00,0.79)                                  | 0.000                   |
| Loop inconsistency is these 95% confidence interval of IF do not include zero. PCSK9 = proprotein convertase subtilisin/kexin type 9. |                                                   |                         |

**Table S6.** Assessment of global inconsistency in network using the ‘design-by-treatment’ interaction model

| <b>Network outcomes</b>  | $X^2$ | <i>p</i> |
|--------------------------|-------|----------|
| LDL-C Cholesterol        | 1.06  | 0.9580   |
| HDL Cholesterol          | 4.70  | 0.4531   |
| TC Cholesterol           | 2.40  | 0.4944   |
| All-cause Mortality      | 6.16  | 0.2910   |
| Cardiovascular Events    | 4.88  | 0.4308   |
| Cardiovascular Mortality | 3.55  | 0.6154   |
| Serious adverse events   | 2.72  | 0.7431   |
| Neurocognitive events    | 3.70  | 0.1573   |
| Diabetes mellitus        | 0.42  | 0.5153   |
| Alanine aminotransferase | 5.87  | 0.3192   |
| Creatine kinase          | 5.37  | 0.3729   |

**Table S7. Assessment of inconsistency in network using node-splitting method**

| Side                            | Direct    |          | Indirect  |          | Difference |          | <i>P</i> > <i>z</i> |
|---------------------------------|-----------|----------|-----------|----------|------------|----------|---------------------|
|                                 | MD        | SE       | MD        | SE       | MD         | SE       |                     |
| <b>LDL-C Cholesterol</b>        |           |          |           |          |            |          |                     |
| AB *                            | -34.25191 | 5.598098 | -32.35565 | 15.24308 | -1.896263  | 16.25099 | 0.907               |
| AC                              | -18.98119 | 4.20185  | -17.79963 | 7.445088 | -1.181552  | 8.549083 | 0.89                |
| AD                              | -51.2717  | 4.471976 | -49.26347 | 7.661502 | -2.008235  | 8.871485 | 0.821               |
| BC                              | 15.3439   | 7.234701 | 15.30719  | 9.107439 | 0.036716   | 11.63768 | 0.997               |
| CD                              | -32.61689 | 5.675222 | -31.34708 | 6.47908  | -1.269805  | 8.613301 | 0.883               |
| <b>HDL Cholesterol</b>          |           |          |           |          |            |          |                     |
| AB *                            | 4.439886  | 0.761344 | 2.076081  | 2.290125 | 2.363805   | 2.453188 | 0.335               |
| AC                              | 2.645776  | 0.634813 | 1.613645  | 1.221601 | 1.032132   | 1.374759 | 0.453               |
| AD                              | 6.904214  | 0.740043 | 8.63683   | 1.233247 | -1.73262   | 1.443118 | 0.230               |
| BC                              | -1.38092  | 1.017874 | -2.34124  | 1.303222 | 0.960323   | 1.673548 | 0.566               |
| CD                              | 5.859438  | 0.937287 | 3.864463  | 1.011478 | 1.994975   | 1.384029 | 0.149               |
| <b>TC Cholesterol</b>           |           |          |           |          |            |          |                     |
| AB *                            | -24.788   | 2.146922 | -24.4767  | 6.14591  | -0.31126   | 6.524142 | 0.962               |
| AC                              | -12.7974  | 1.704555 | -17.2585  | 3.263156 | 4.461104   | 3.681609 | 0.226               |
| AD                              | -37.8391  | 2.338783 | -32.1902  | 3.122321 | -5.64881   | 3.901138 | 0.148               |
| BC                              | 11.20461  | 2.781255 | 10.64914  | 3.656018 | 0.555469   | 4.600281 | 0.904               |
| CD                              | -19.4522  | 2.649189 | -25.0964  | 2.863959 | 5.644162   | 3.901269 | 0.148               |
| <b>Cardiovascular Events</b>    |           |          |           |          |            |          |                     |
| AB *                            | -0.21804  | 0.028664 | -1.45239  | 1.563152 | 1.234348   | 1.563417 | 0.430               |
| AC                              | -0.05635  | 0.081754 | -0.38582  | 0.330919 | 0.329468   | 0.341036 | 0.334               |
| AD                              | -0.21195  | 0.069484 | 0.170727  | 0.345231 | -0.38268   | 0.352676 | 0.278               |
| BC                              | 1.298057  | 0.897185 | 0.133345  | 0.083234 | 1.164712   | 0.901032 | 0.196               |
| CD                              | 0.194331  | 0.311056 | -0.15921  | 0.108637 | 0.353543   | 0.329324 | 0.283               |
| <b>All-cause Mortality</b>      |           |          |           |          |            |          |                     |
| AB *                            | -0.09795  | 0.029551 | -1.36645  | 1.560542 | 1.268499   | 1.560595 | 0.416               |
| AC                              | -0.05133  | 0.070296 | 1.11689   | 0.513526 | -1.16822   | 0.516949 | 0.024**             |
| AD                              | -0.01984  | 0.088838 | -0.94225  | 0.541053 | 0.922414   | 0.546892 | 0.092               |
| BC                              | 1.298189  | 0.89672  | 0.056773  | 0.072834 | 1.241416   | 0.899669 | 0.168               |
| CD                              | -0.9139   | 0.502238 | 0.032899  | 0.107065 | -0.94679   | 0.513529 | 0.065               |
| <b>Cardiovascular Mortality</b> |           |          |           |          |            |          |                     |
| AB *                            | -0.19162  | 0.051864 | -1.28293  | 1.580433 | 1.091303   | 1.581302 | 0.490               |
| AC                              | -0.02655  | 0.13371  | 0.799517  | 0.552804 | -0.82606   | 0.567995 | 0.146               |
| AD                              | -0.04988  | 0.14932  | -0.55238  | 0.587372 | 0.502495   | 0.605455 | 0.407               |
| BC                              | 1.29814   | 0.898631 | 0.184336  | 0.14233  | 1.113804   | 0.909819 | 0.221               |
| CD                              | -0.61459  | 0.529311 | -0.02341  | 0.200817 | -0.59118   | 0.566136 | 0.296               |
| <b>Serious adverse events</b>   |           |          |           |          |            |          |                     |
| AB *                            | -0.01293  | 0.022852 | -1.1608   | 2.356139 | 1.147868   | 2.356311 | 0.626               |
| AC                              | -0.35672  | 0.233058 | -0.04506  | 0.160089 | -0.31166   | 0.27508  | 0.257               |
| AD                              | -0.01531  | 0.024535 | -0.34316  | 0.303407 | 0.327845   | 0.304375 | 0.281               |

|    |          |          |          |          |          |          |       |
|----|----------|----------|----------|----------|----------|----------|-------|
| BC | 0.721613 | 1.242356 | -0.13848 | 0.138019 | 0.860093 | 1.248887 | 0.491 |
| CD | 0.062572 | 0.154995 | 0.285296 | 0.241511 | -0.22272 | 0.277683 | 0.423 |

#### Neurocognitive events

|     |          |          |          |          |          |          |       |
|-----|----------|----------|----------|----------|----------|----------|-------|
| AB  | .        | .        | .        | .        | .        | .        | .     |
| AC  | 3.475959 | 1.350241 | 0.657826 | 0.707907 | 2.818132 | 1.614286 | 0.081 |
| AD* | 0.194735 | 0.219185 | 4.634044 | 2.307107 | -4.43931 | 2.305992 | 0.054 |
| CD* | -1.02464 | 0.591761 | -3.39186 | 3.070773 | 2.367215 | 3.168005 | 0.455 |

#### New-onset diabetes

|     |          |          |          |          |          |          |       |
|-----|----------|----------|----------|----------|----------|----------|-------|
| AB  | .        | .        | .        | .        | .        | .        | .     |
| AC* | 0.687638 | 2.008324 | -1.44769 | 2.599645 | 2.135328 | 3.281716 | 0.515 |
| AD  | .        | .        | .        | .        | .        | .        | .     |
| CD* | 0.422086 | 1.643214 | -1.71324 | 3.279906 | 2.135328 | 3.281716 | 0.515 |

#### Alanine aminotransferase

|      |          |          |          |           |          |          |       |
|------|----------|----------|----------|-----------|----------|----------|-------|
| AB * | 0.652469 | 0.148128 | -0.17051 | 1.344088  | 0.822975 | 1.359409 | 0.545 |
| AC   | 0.056679 | 0.249533 | 0.516735 | 0.5289045 | -0.46006 | 0.577567 | 0.426 |
| AD   | -0.13413 | 0.197245 | 0.502289 | 0.6512191 | -0.63642 | 0.679713 | 0.349 |
| BC   | 0.128723 | 0.637262 | -0.6262  | 0.2911915 | 0.754918 | 0.695728 | 0.278 |
| CD   | -0.27959 | 0.462524 | -0.18656 | 0.3378483 | -0.09303 | 0.571831 | 0.871 |

#### Creatine kinase

|      |          |          |          |          |          |          |       |
|------|----------|----------|----------|----------|----------|----------|-------|
| AB * | 0.382736 | 0.145379 | -0.56896 | 1.391608 | 0.951699 | 1.399991 | 0.497 |
| AC   | -0.40333 | 0.254204 | 0.057914 | 0.382013 | -0.46124 | 0.451402 | 0.307 |
| AD   | -0.28232 | 0.158216 | -0.22269 | 0.458323 | -0.05963 | 0.482339 | 0.902 |
| BC   | 0.455567 | 0.676592 | -0.79068 | 0.25777  | 1.246252 | 0.718214 | 0.083 |
| CD   | -0.04308 | 0.356107 | 0.017    | 0.297976 | -0.06008 | 0.462232 | 0.897 |

\*Warning: all the evidence about these contrasts comes from the trials which directly compare them. No inconsistency was found for all efficacy and safety outcomes. \*\*Inconsistency was detected between direct and indirect evidences. A = Placebo, B = Statins, C = Ezetimibe, D = proprotein convertase subtilisin/kexin type 9 inhibitors. SE = standard error, MD = mean difference.



**Figure S1. The summarized quality of included studies as assessed by tool recommended in Cochrane Collaboration guidelines.**

|                       | Random sequence generation (selection bias) | Allocation concealment (selection bias) | Blinding of participants and personnel (performance bias) | Blinding of outcome assessment (detection bias) | Incomplete outcome data (attrition bias) | Selective reporting (reporting bias) | Other bias |
|-----------------------|---------------------------------------------|-----------------------------------------|-----------------------------------------------------------|-------------------------------------------------|------------------------------------------|--------------------------------------|------------|
| ALLHAT-LLT 2002       | ●                                           | ●                                       | ●                                                         | ●                                               | ●                                        | ●                                    | ●          |
| ALLIANCE 2004         | ?                                           | ?                                       | ●                                                         | ●                                               | ●                                        | ●                                    | ●          |
| Alimera 2012          | ?                                           | ?                                       | ?                                                         | ?                                               | ?                                        | ?                                    | ?          |
| ASCOT-LLA 2005        | ●                                           | ●                                       | ●                                                         | ●                                               | ●                                        | ●                                    | ●          |
| ASPEN                 | ?                                           | ?                                       | ?                                                         | ?                                               | ?                                        | ?                                    | ?          |
| ASTRONOMER 2010       | ●                                           | ●                                       | ●                                                         | ●                                               | ●                                        | ●                                    | ●          |
| ATHEROMA 2006         | ●                                           | ●                                       | ●                                                         | ●                                               | ●                                        | ●                                    | ●          |
| A to Z 2004           | ?                                           | ?                                       | ●                                                         | ●                                               | ●                                        | ●                                    | ●          |
| Balantyne 2003        | ?                                           | ?                                       | ?                                                         | ?                                               | ?                                        | ?                                    | ?          |
| Bays 2004             | ?                                           | ?                                       | ?                                                         | ?                                               | ?                                        | ?                                    | ?          |
| Bruckert 2003         | ?                                           | ?                                       | ?                                                         | ?                                               | ?                                        | ?                                    | ?          |
| CARDS 2004            | ●                                           | ●                                       | ●                                                         | ●                                               | ●                                        | ●                                    | ●          |
| CERDA 2006            | ●                                           | ●                                       | ●                                                         | ●                                               | ●                                        | ●                                    | ●          |
| COMETS 2006           | ?                                           | ?                                       | ?                                                         | ?                                               | ?                                        | ?                                    | ?          |
| Cruz-Fernandez 2006   | ●                                           | ●                                       | ●                                                         | ●                                               | ●                                        | ●                                    | ?          |
| Davidson et al 2002   | ?                                           | ?                                       | ?                                                         | ?                                               | ?                                        | ?                                    | ?          |
| Davidson MH 2002      | ●                                           | ●                                       | ●                                                         | ●                                               | ●                                        | ●                                    | ?          |
| DESCARTES             | ●                                           | ●                                       | ●                                                         | ●                                               | ●                                        | ●                                    | ●          |
| Dujovne et al 2002    | ?                                           | ?                                       | ?                                                         | ?                                               | ?                                        | ?                                    | ?          |
| ENHANCE               | ●                                           | ●                                       | ●                                                         | ●                                               | ●                                        | ●                                    | ●          |
| FAST                  | ●                                           | ●                                       | ●                                                         | ●                                               | ●                                        | ●                                    | ●          |
| Falkman 2004          | ?                                           | ?                                       | ●                                                         | ●                                               | ●                                        | ●                                    | ?          |
| FOURIER 2011          | ●                                           | ●                                       | ●                                                         | ●                                               | ●                                        | ●                                    | ●          |
| GAUSS                 | ●                                           | ●                                       | ●                                                         | ●                                               | ●                                        | ●                                    | ●          |
| GAUSS 2               | ?                                           | ?                                       | ●                                                         | ●                                               | ●                                        | ●                                    | ●          |
| GAUSS-3               | ●                                           | ●                                       | ●                                                         | ●                                               | ●                                        | ●                                    | ●          |
| GESI P 2006           | ●                                           | ●                                       | ●                                                         | ●                                               | ●                                        | ●                                    | ?          |
| GLAGOV 2016           | ●                                           | ●                                       | ●                                                         | ●                                               | ●                                        | ●                                    | ●          |
| Güllberg 2004         | ●                                           | ●                                       | ●                                                         | ●                                               | ●                                        | ●                                    | ?          |
| GREACE                | ?                                           | ?                                       | ●                                                         | ●                                               | ●                                        | ●                                    | ●          |
| HU-PROPER 2016        | ●                                           | ●                                       | ●                                                         | ●                                               | ●                                        | ●                                    | ●          |
| HCPES 2016            | ●                                           | ●                                       | ●                                                         | ●                                               | ●                                        | ●                                    | ●          |
| HYRM 2007             | ?                                           | ?                                       | ?                                                         | ?                                               | ?                                        | ?                                    | ?          |
| ICEL 2006             | ?                                           | ?                                       | ●                                                         | ●                                               | ●                                        | ●                                    | ●          |
| IMPROVE-IT 2015       | ●                                           | ●                                       | ●                                                         | ●                                               | ●                                        | ●                                    | ●          |
| JUPITER 2008          | ●                                           | ●                                       | ●                                                         | ●                                               | ●                                        | ●                                    | ●          |
| JUST                  | ●                                           | ●                                       | ●                                                         | ●                                               | ●                                        | ●                                    | ●          |
| Karim 2003            | ?                                           | ?                                       | ?                                                         | ?                                               | ?                                        | ?                                    | ?          |
| Kroop 2003            | ?                                           | ?                                       | ?                                                         | ?                                               | ?                                        | ?                                    | ?          |
| LAPLACE 2             | ●                                           | ●                                       | ●                                                         | ●                                               | ●                                        | ●                                    | ●          |
| LAPLACE TMI 07        | ●                                           | ●                                       | ●                                                         | ●                                               | ●                                        | ●                                    | ●          |
| LIPS 2003             | ?                                           | ?                                       | ?                                                         | ?                                               | ?                                        | ?                                    | ?          |
| MARS                  | ?                                           | ?                                       | ?                                                         | ?                                               | ?                                        | ?                                    | ?          |
| Masana 2006           | ?                                           | ?                                       | ?                                                         | ?                                               | ?                                        | ?                                    | ?          |
| Meads 2016            | ●                                           | ●                                       | ●                                                         | ●                                               | ●                                        | ●                                    | ?          |
| McSorrey et al        | ?                                           | ?                                       | ?                                                         | ?                                               | ?                                        | ?                                    | ?          |
| MEGA 2006             | ●                                           | ●                                       | ●                                                         | ●                                               | ●                                        | ●                                    | ●          |
| Milan 2003            | ●                                           | ●                                       | ●                                                         | ●                                               | ●                                        | ●                                    | ?          |
| MENCEL                | ●                                           | ●                                       | ●                                                         | ●                                               | ●                                        | ●                                    | ●          |
| MENCEL-2              | ?                                           | ?                                       | ●                                                         | ●                                               | ●                                        | ●                                    | ●          |
| METOR 2010            | ●                                           | ●                                       | ●                                                         | ●                                               | ●                                        | ●                                    | ●          |
| MIRCOR                | ●                                           | ●                                       | ●                                                         | ●                                               | ●                                        | ●                                    | ●          |
| ODYSSEY ALTERNATIVE   | ?                                           | ?                                       | ?                                                         | ?                                               | ?                                        | ?                                    | ?          |
| ODYSSEY COMBO         | ?                                           | ?                                       | ?                                                         | ?                                               | ?                                        | ?                                    | ?          |
| ODYSSEY COMBO H       | ●                                           | ●                                       | ●                                                         | ●                                               | ●                                        | ●                                    | ●          |
| ODYSSEY FH 1 and FH 2 | ?                                           | ?                                       | ?                                                         | ?                                               | ?                                        | ?                                    | ?          |
| ODYSSEY HIGH FH       | ?                                           | ?                                       | ?                                                         | ?                                               | ?                                        | ?                                    | ?          |
| ODYSSEY LONG TERM     | ?                                           | ?                                       | ?                                                         | ?                                               | ?                                        | ?                                    | ?          |
| ODYSSEY MONG          | ?                                           | ?                                       | ?                                                         | ?                                               | ?                                        | ?                                    | ?          |
| ODYSSEY OPTIONS       | ●                                           | ●                                       | ●                                                         | ●                                               | ●                                        | ●                                    | ●          |
| ODYSSEY OPTIONS H     | ?                                           | ?                                       | ?                                                         | ?                                               | ?                                        | ?                                    | ?          |
| ODYSSEY OUTCOMES 2016 | ●                                           | ●                                       | ●                                                         | ●                                               | ●                                        | ●                                    | ●          |
| OLIVER 1 2            | ●                                           | ●                                       | ●                                                         | ●                                               | ●                                        | ●                                    | ●          |
| Pain 2006             | ?                                           | ?                                       | ?                                                         | ?                                               | ?                                        | ?                                    | ?          |
| PHYLLIS 2004          | ●                                           | ●                                       | ●                                                         | ●                                               | ●                                        | ●                                    | ●          |
| PRECISE-AVUS 2016     | ●                                           | ●                                       | ●                                                         | ●                                               | ●                                        | ●                                    | ●          |
| PREVEND IT            | ?                                           | ?                                       | ?                                                         | ?                                               | ?                                        | ?                                    | ?          |
| PROSPER               | ●                                           | ●                                       | ●                                                         | ●                                               | ●                                        | ●                                    | ●          |
| PROVE-IT 2004         | ●                                           | ●                                       | ●                                                         | ●                                               | ●                                        | ●                                    | ●          |
| RCABS 2006            | ●                                           | ●                                       | ●                                                         | ●                                               | ●                                        | ●                                    | ●          |
| Roth et al 2012       | ●                                           | ●                                       | ●                                                         | ●                                               | ●                                        | ●                                    | ●          |
| RUTHERFORD            | ●                                           | ●                                       | ●                                                         | ●                                               | ●                                        | ●                                    | ●          |
| RUTHERFORD-2          | ●                                           | ●                                       | ●                                                         | ●                                               | ●                                        | ●                                    | ●          |
| SCAT                  | ?                                           | ?                                       | ?                                                         | ?                                               | ?                                        | ?                                    | ?          |
| SEARCH 2010           | ●                                           | ●                                       | ●                                                         | ●                                               | ●                                        | ●                                    | ●          |
| Shankar 2007          | ?                                           | ?                                       | ?                                                         | ?                                               | ?                                        | ?                                    | ?          |
| SPIRE 2017            | ●                                           | ●                                       | ●                                                         | ●                                               | ●                                        | ●                                    | ●          |
| Stolt et al           | ●                                           | ●                                       | ●                                                         | ●                                               | ●                                        | ●                                    | ●          |
| Strong 2008           | ?                                           | ?                                       | ?                                                         | ?                                               | ?                                        | ?                                    | ?          |
| TNT 2005              | ?                                           | ?                                       | ?                                                         | ?                                               | ?                                        | ?                                    | ?          |
| UK-SARP-II 2006       | ●                                           | ●                                       | ●                                                         | ●                                               | ●                                        | ●                                    | ●          |
| Wang 2016             | ?                                           | ?                                       | ?                                                         | ?                                               | ?                                        | ?                                    | ?          |
| YUKAWA                | ?                                           | ?                                       | ?                                                         | ?                                               | ?                                        | ?                                    | ?          |
| YUKAWA 2              | ?                                           | ?                                       | ?                                                         | ?                                               | ?                                        | ?                                    | ?          |

The judgment (Low, Unclear, and High) of each risk of bias item was based on the recommended tool in Cochrane review.

**Figure S2A: Ranking of the effects of statins, ezetimibe, PCSK9 inhibitors for improving LDL-C cholesterol level. PCSK9 = proprotein convertase subtilisin-kexin type 9 serine protease.**

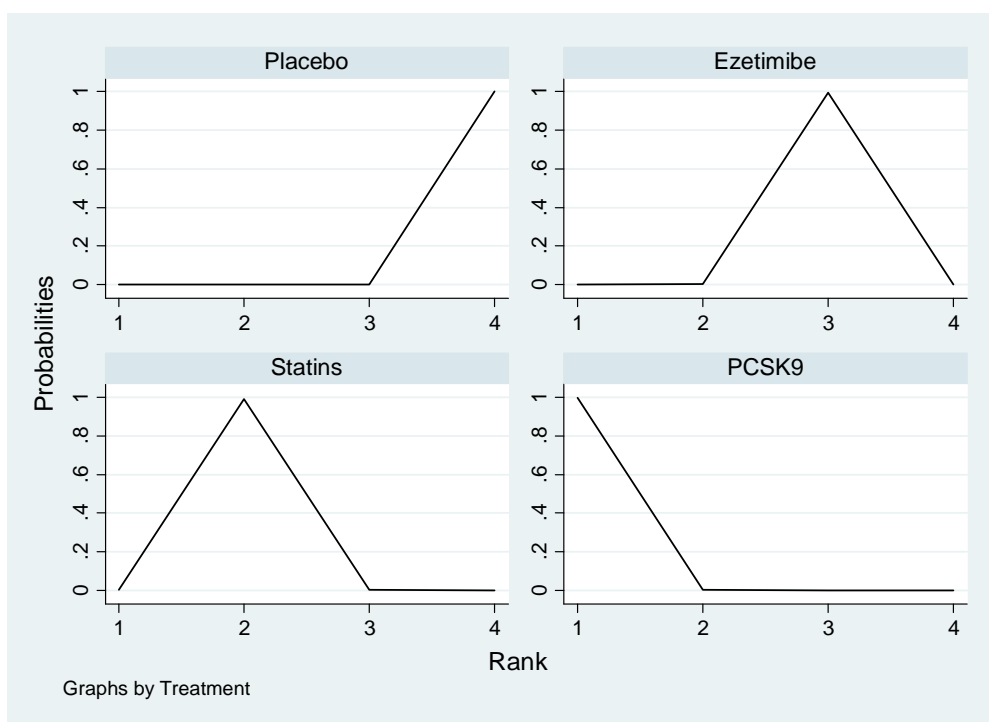

| Treatment       | SUCRA | PrBest | MeanRank |
|-----------------|-------|--------|----------|
| Placebo         | 0.0   | 0.0    | 4.0      |
| Statin          | 66.7  | 0.2    | 2.0      |
| Ezetimibe       | 33.4  | 0.0    | 3.0      |
| PCSK9 inhibitor | 99.9  | 99.8   | 1.0      |

**Figure S2B: Rankogram of statins, ezetimibe, PCSK9 inhibitors for HDL cholesterol level. PCSK9 = proprotein convertase subtilisin-kexin type 9 serine protease.**

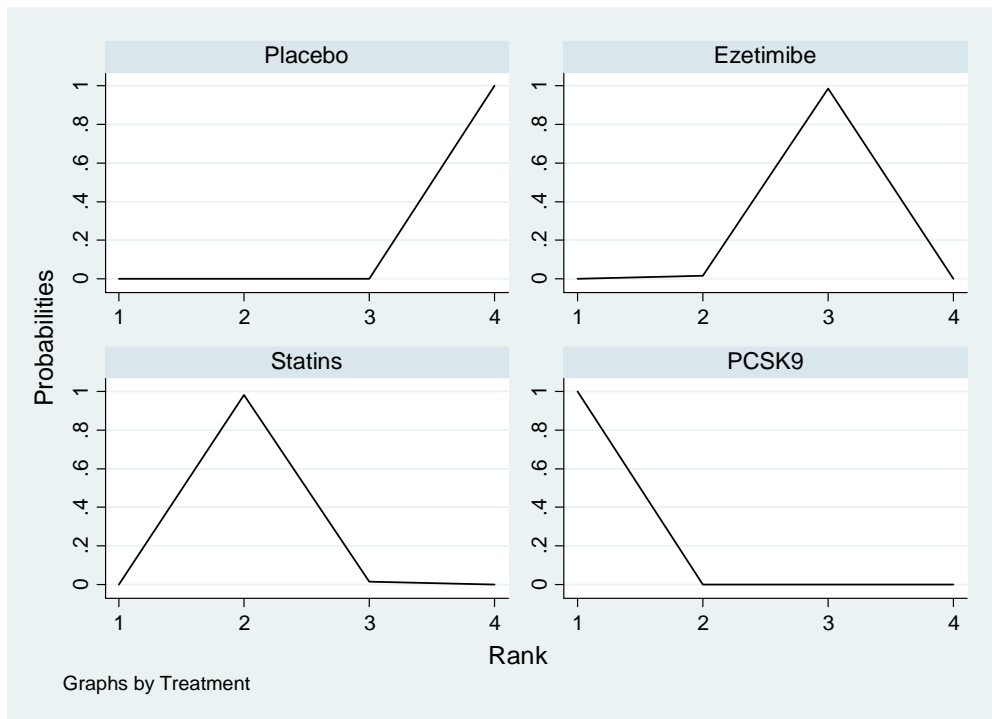

| Treatment       | SUCRA | PrBest | MeanRank |
|-----------------|-------|--------|----------|
| Placebo         | 0.0   | 0.0    | 4.0      |
| Statin          | 66.2  | 0.0    | 2.0      |
| Ezetimibe       | 33.8  | 0.0    | 3.0      |
| PCSK9 inhibitor | 100.0 | 100.0  | 1.0      |

**Figure S2C: Rankogram of statins, ezetimibe, PCSK9 inhibitors for TC cholesterol level. PCSK9 = proprotein convertase subtilisin-kexin type 9 serine protease.**

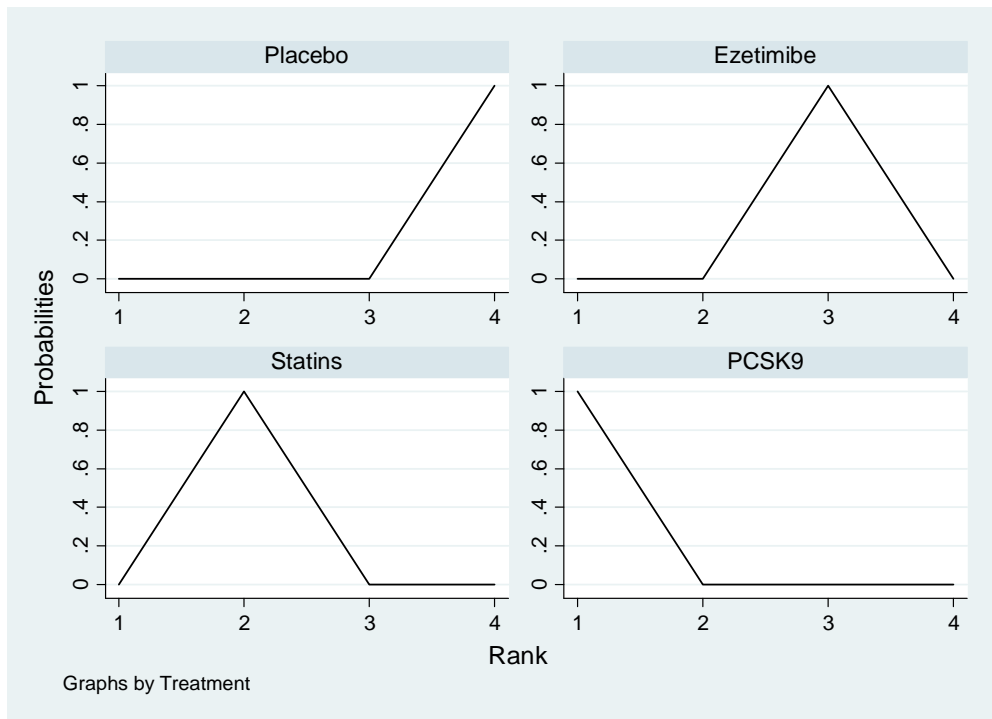

| Treatment       | SUCRA | PrBest | MeanRank |
|-----------------|-------|--------|----------|
| Placebo         | 0.0   | 0.0    | 4.0      |
| Statin          | 66.2  | 0.0    | 2.0      |
| Ezetimibe       | 33.3  | 0.0    | 3.0      |
| PCSK9 inhibitor | 100.0 | 100.0  | 1.0      |

**Figure S3: Network comparison among statins, ezetimibe, and PCSK9 inhibitors for cardiovascular events in patients with hypercholesterolemia.**

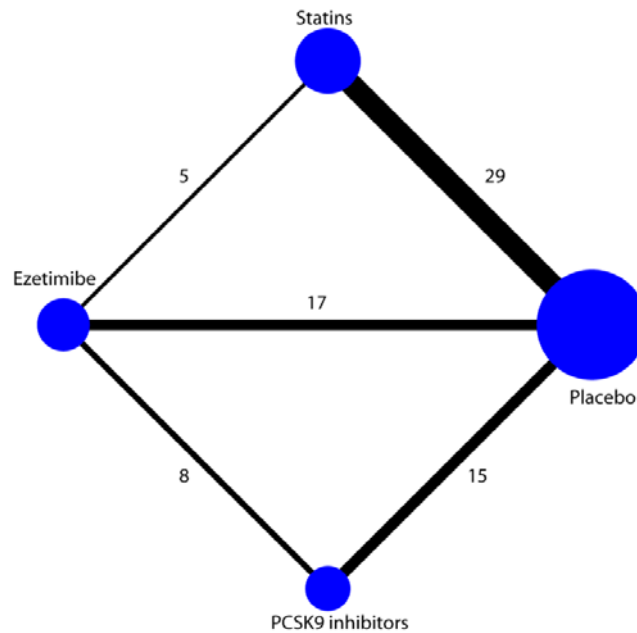

The size of the nodes (navy blue circles) is proportional to the number of trials that randomised to corresponding treatment and the thickness of lines to the number of trials that evaluated the comparison. Numbers next to the line which connect two interventions refer to the number of studies that compared the interventions. PCSK9 = proprotein convertase subtilisin-kexin type 9 serine protease.

**Figure S4: Rankogram of statins, ezetimibe, PCSK9 inhibitors for cardiovascular events. PCSK9 = proprotein convertase subtilisin-kexin type 9 serine protease.**

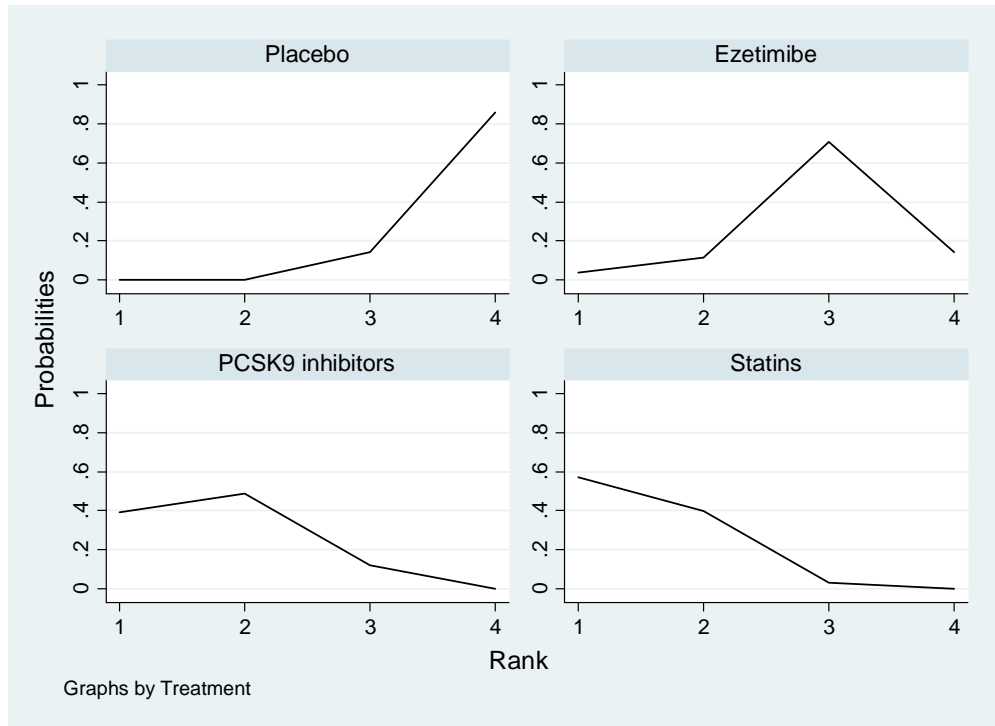

| Treatment       | SUCRA | PrBest | MeanRank |
|-----------------|-------|--------|----------|
| Placebo         | 4.2   | 0.0    | 3.9      |
| Statin          | 85.3  | 59.4   | 1.4      |
| Ezetimibe       | 35.3  | 3.3    | 2.9      |
| PCSK9 inhibitor | 75.2  | 37.3   | 1.7      |

**Figure S5A: Rankogram of statins, ezetimibe, PCSK9 inhibitors for all-cause mortality.**

**PCSK9 = proprotein convertase subtilisin-kexin type 9 serine protease.**

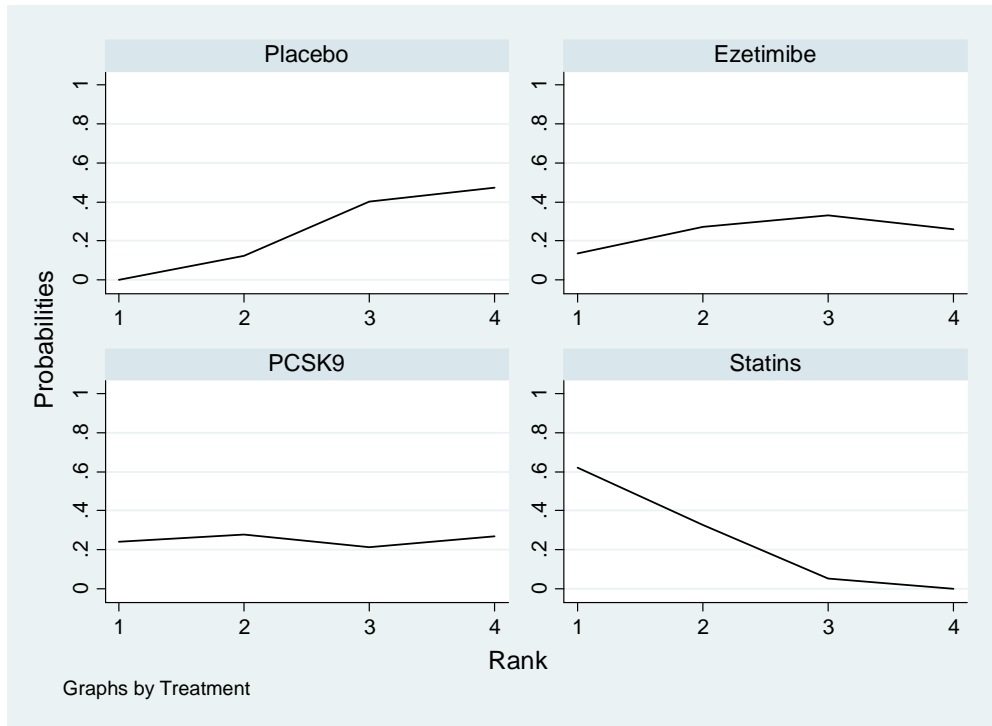

| Treatment       | SUCRA | PrBest | MeanRank |
|-----------------|-------|--------|----------|
| Placebo         | 21.6  | 0.0    | 3.4      |
| Statin          | 85.4  | 62.0   | 1.4      |
| Ezetimibe       | 42.7  | 12.5   | 2.7      |
| PCSK9 inhibitor | 50.3  | 25.5   | 2.5      |

**Figure S5B: Rankogram of statins, ezetimibe, PCSK9 inhibitors for cardiovascular mortality. PCSK9 = proprotein convertase subtilisin-kexin type 9 serine protease.**

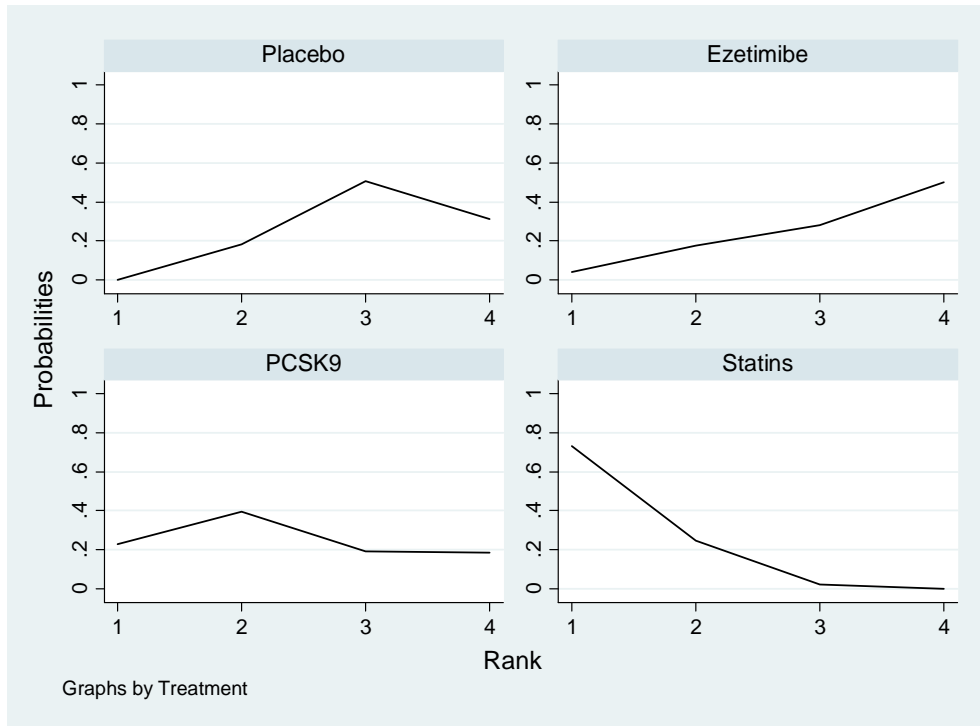

| Treatment       | SUCRA | PrBest | MeanRank |
|-----------------|-------|--------|----------|
| Placebo         | 30.1  | 0.1    | 3.1      |
| Statin          | 91.2  | 75.8   | 1.3      |
| Ezetimibe       | 25.2  | 4.1    | 3.2      |
| PCSK9 inhibitor | 53.5  | 20.0   | 2.4      |



**Figure S6A: Rankogram of statins, ezetimibe, PCSK9 inhibitors for serious adverse events. PCSK9 = proprotein convertase subtilisin-kexin type 9 serine protease.**

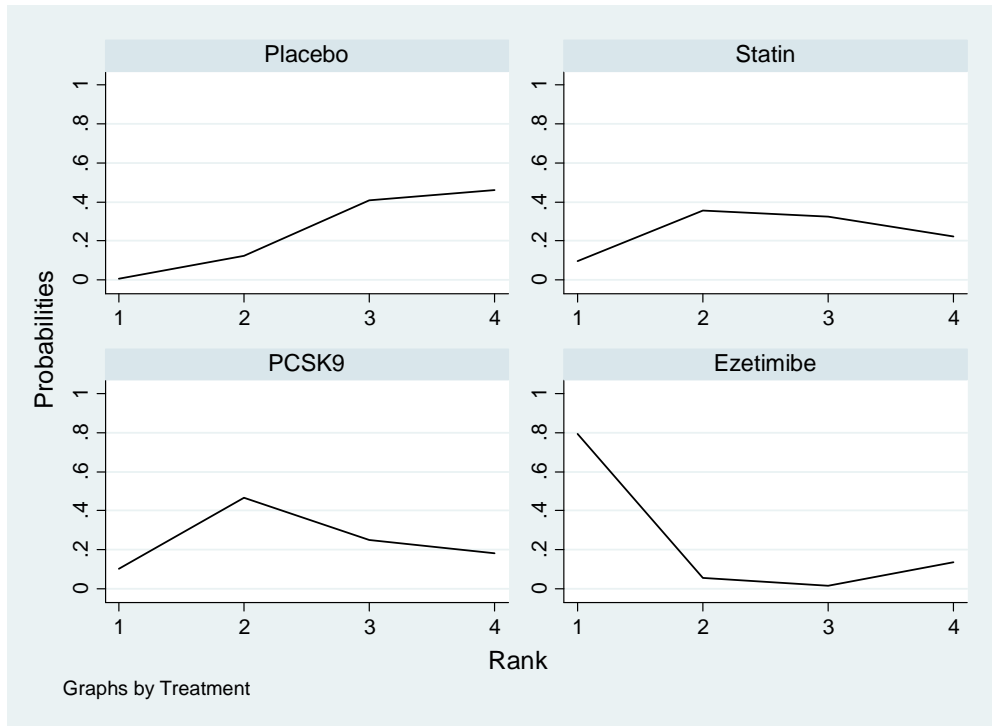

| Treatment       | SUCRA | PrBest | MeanRank |
|-----------------|-------|--------|----------|
| Placebo         | 22.3  | 1.0    | 3.3      |
| Statin          | 43.3  | 9.1    | 2.7      |
| Ezetimibe       | 83.3  | 79.5   | 1.5      |
| PCSK9 inhibitor | 51.2  | 10.4   | 2.5      |

**Figure S6B: Rankogram of statins, ezetimibe, PCSK9 inhibitors for neurocognitive events. PCSK9 = proprotein convertase subtilisin-kexin type 9 serine protease.**

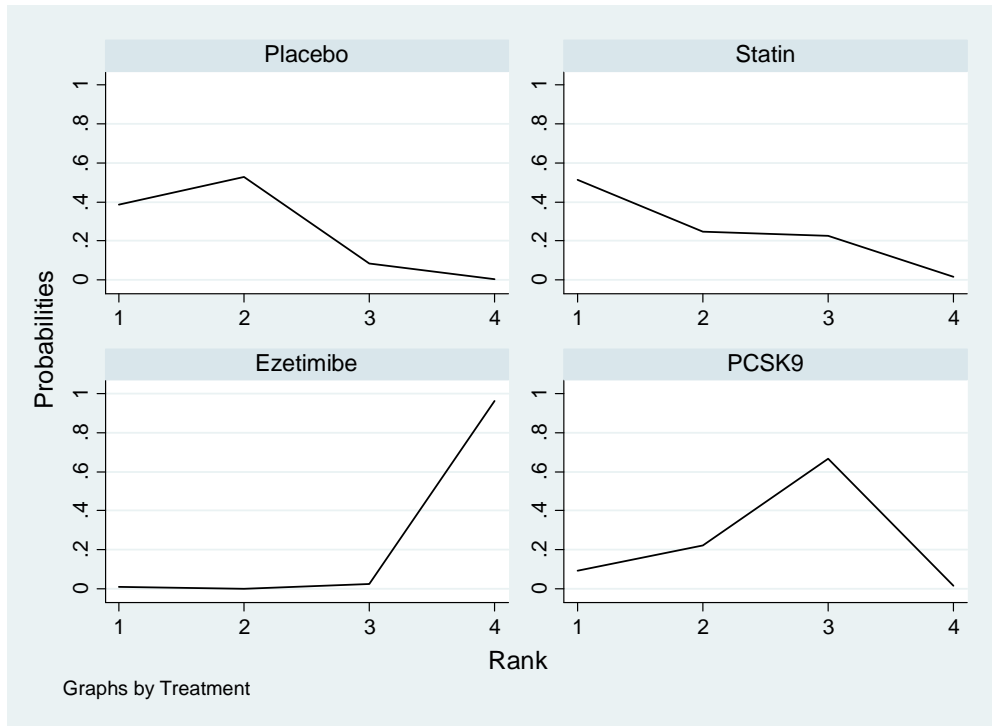

| Treatment       | SUCRA | PrBest | MeanRank |
|-----------------|-------|--------|----------|
| Placebo         | 75.9  | 38.3   | 1.7      |
| Statin          | 75.2  | 51.4   | 1.7      |
| Ezetimibe       | 2.3   | 0.6    | 3.9      |
| PCSK9 inhibitor | 46.5  | 9.7    | 2.6      |

**Figure S7A: Rankogram of statins, ezetimibe, PCSK9 inhibitors for new-onset diabetes.**

**PCSK9 = proprotein convertase subtilisin-kexin type 9 serine protease.**

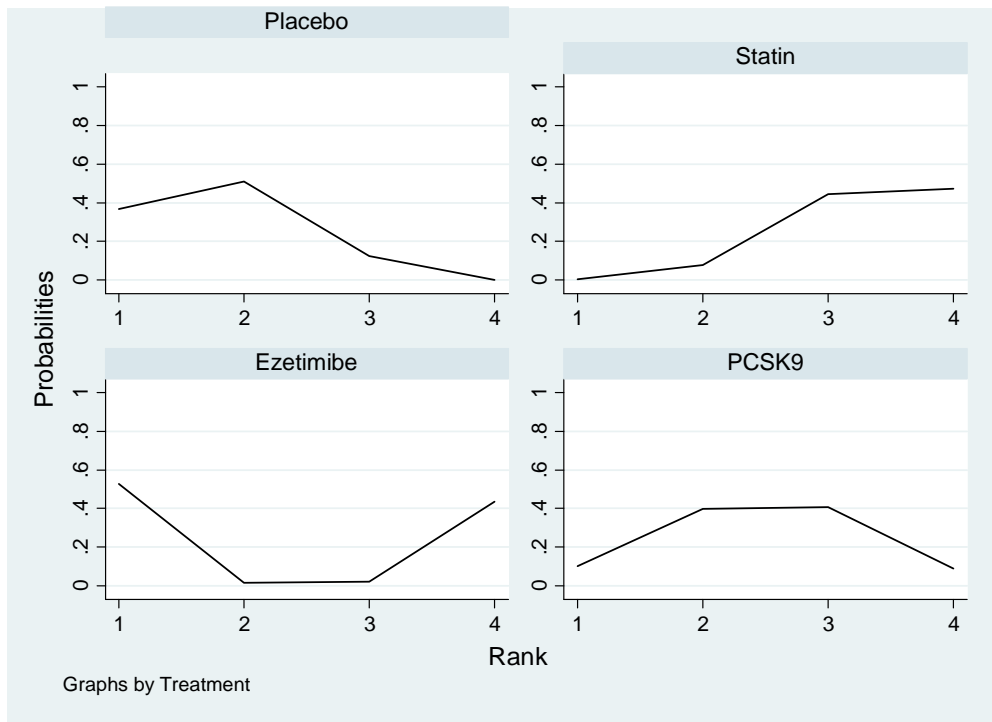

| Treatment       | SUCRA | PrBest | MeanRank |
|-----------------|-------|--------|----------|
| Placebo         | 62.7  | 20.9   | 2.1      |
| Statin          | 15.4  | 0.5    | 3.5      |
| Ezetimibe       | 56.2  | 54.7   | 2.3      |
| PCSK9 inhibitor | 65.7  | 23.9   | 2.0      |

**Figure S7B: Rankogram of statins, ezetimibe, PCSK9 inhibitors for alanine aminotransferase. PCSK9 = proprotein convertase subtilisin-kexin type 9 serine protease.**

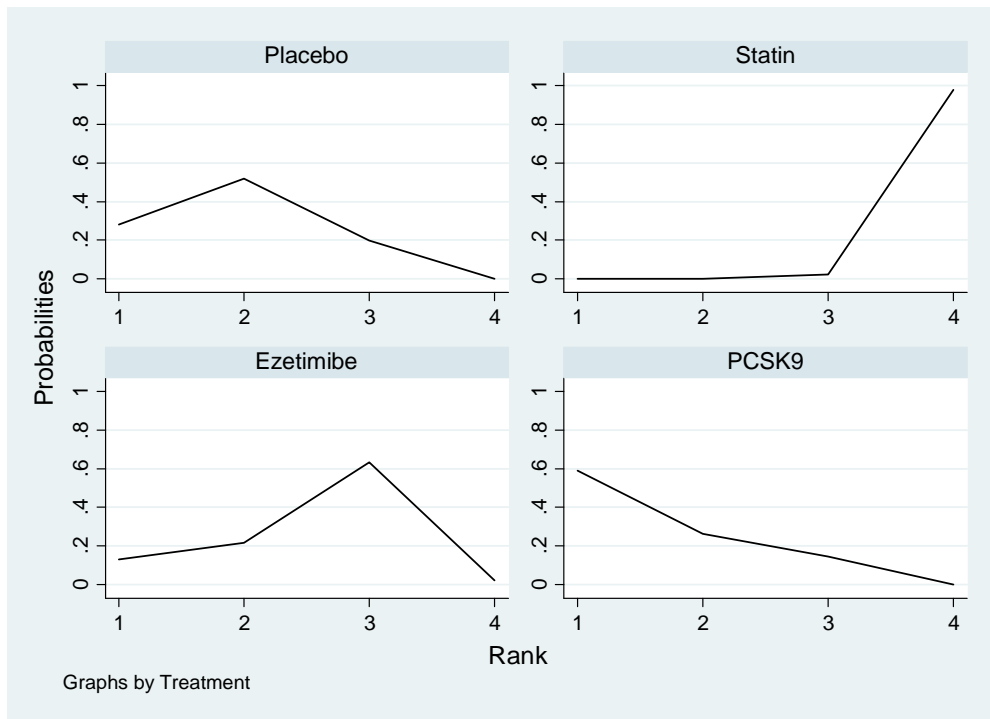

| Treatment       | SUCRA | PrBest | MeanRank |
|-----------------|-------|--------|----------|
| Placebo         | 68.6  | 25.4   | 1.9      |
| Statin          | 0.8   | 0.0    | 4.0      |
| Ezetimibe       | 48.5  | 15.3   | 2.5      |
| PCSK9 inhibitor | 82.1  | 59.3   | 1.5      |

**Figure S7C: Rankogram of statins, ezetimibe, PCSK9 inhibitors for creatine kinase.**

**PCSK9 = proprotein convertase subtilisin-kexin type 9 serine protease.**

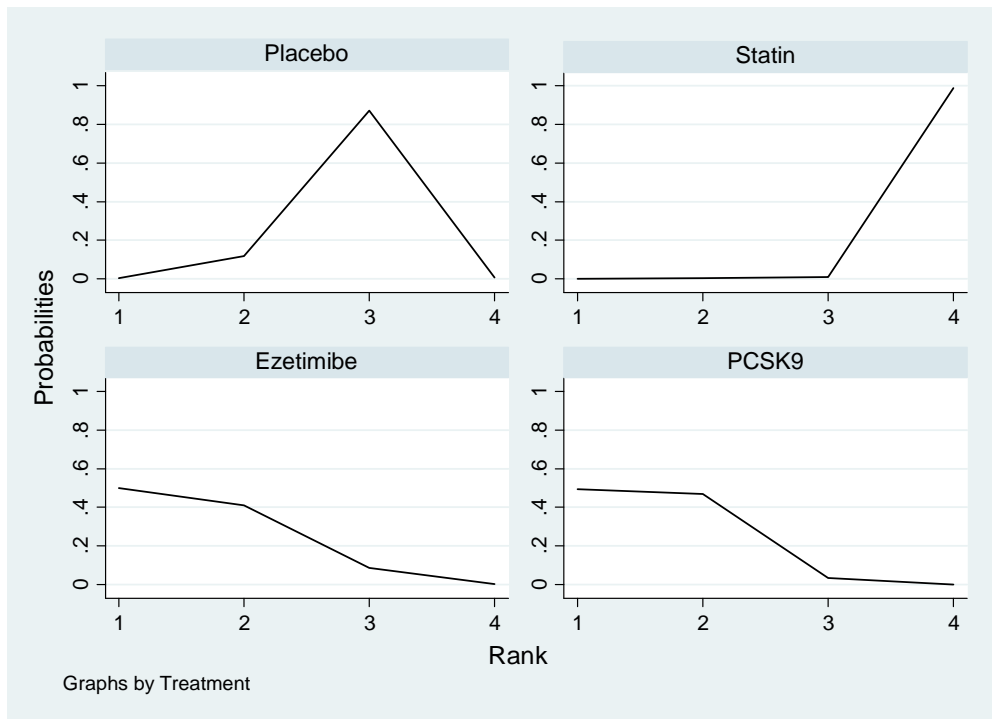

| Treatment       | SUCRA | PrBest | MeanRank |
|-----------------|-------|--------|----------|
| Placebo         | 37.9  | 1.1    | 2.9      |
| Statin          | 0.2   | 0.0    | 4.0      |
| Ezetimibe       | 79.6  | 48.4   | 1.6      |
| PCSK9 inhibitor | 82.3  | 50.5   | 1.5      |

**Figure S8A: Comparison-adjusted funnel plot for the network of cardiovascular events. Pla = placebo, Sta = Statins, Eze = Ezetimibe, P9 = proprotein convertase subtilisin-kexin type 9 serine protease.**

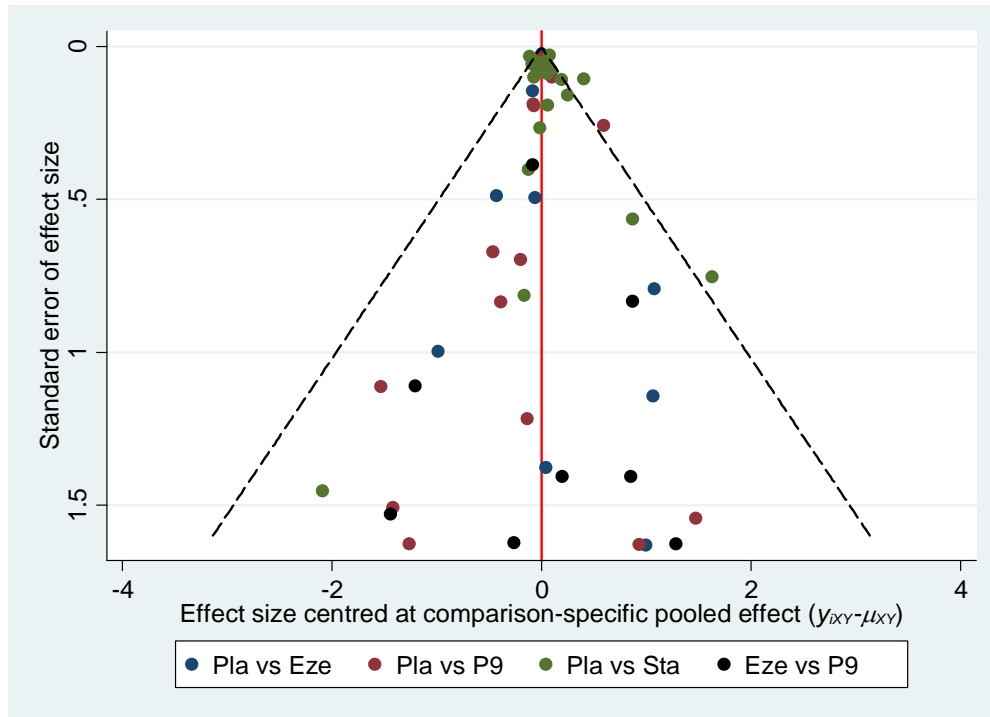

The red solid line represents the null hypothesis that the study-specific effect sizes do not differ from the respective comparison-specific pooled effect estimates. The two black dashed lines represent a 95% CI for the difference between study-specific effect sizes and comparison-specific summary estimates.  $y_{ixy}$  is the noted effect size in study  $i$  that compares  $x$  with  $y$ .  $\mu_{xy}$  is the comparison-specific summary estimate for  $x$  versus  $y$ .

**Figure S8B: Comparison-adjusted funnel plot for the network of all-cause mortality. Pla = placebo, Sta = Statins, Eze = Ezetimibe, P9 = proprotein convertase subtilisin-kexin type 9 serine protease.**

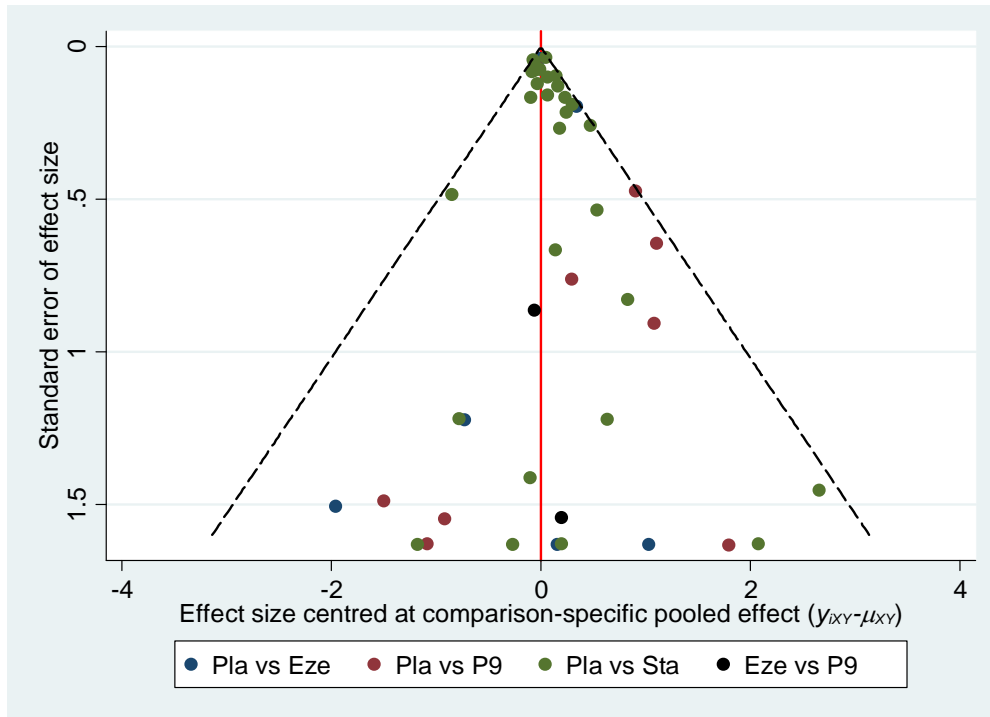

The red solid line represents the null hypothesis that the study-specific effect sizes do not differ from the respective comparison-specific pooled effect estimates. The two black dashed lines represent a 95% CI for the difference between study-specific effect sizes and comparison-specific summary estimates.  $y_{ixy}$  is the noted effect size in study  $i$  that compares  $x$  with  $y$ .  $\mu_{xy}$  is the comparison-specific summary estimate for  $x$  versus  $y$ .

**Figure S8C: Comparison-adjusted funnel plot for the network of cardiovascular mortality. Pla = placebo, Sta = Statins, Eze = Ezetimibe, P9 = proprotein convertase subtilisin-kexin type 9 serine protease.**

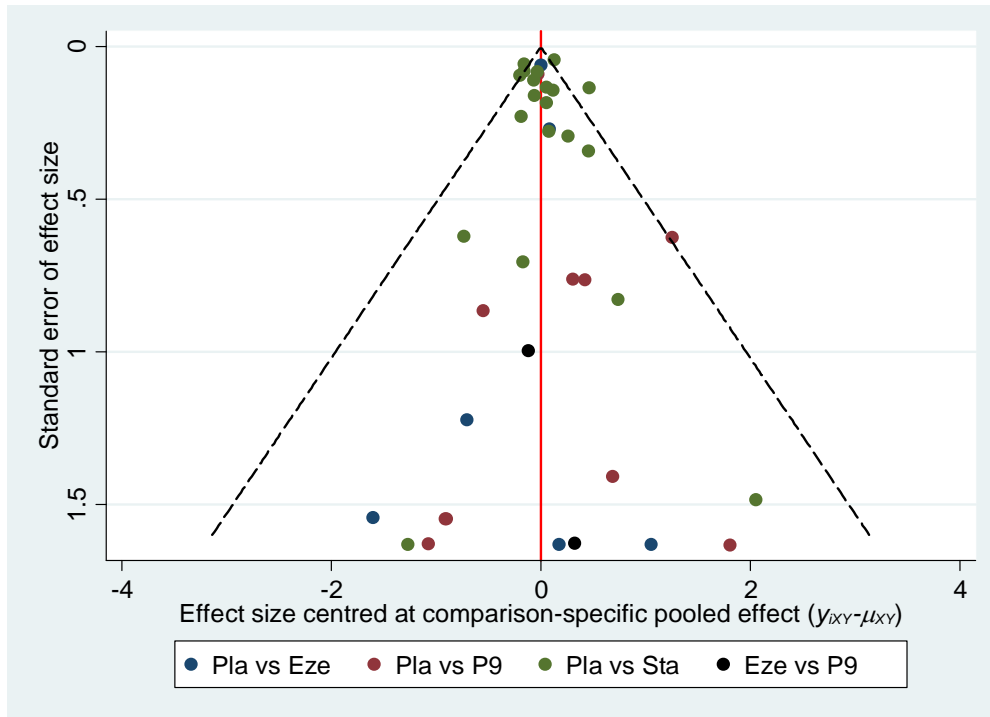

The red solid line represents the null hypothesis that the study-specific effect sizes do not differ from the respective comparison-specific pooled effect estimates. The two black dashed lines represent a 95% CI for the difference between study-specific effect sizes and comparison-specific summary estimates.  $y_{ixy}$  is the noted effect size in study  $i$  that compares  $x$  with  $y$ .  $\mu_{xy}$  is the comparison-specific summary estimate for  $x$  versus  $y$ .



## References

- [1] Teo KK, Burton JR, Buller CE, Plante S, Catellier D, Tymchak W, et al. SCAT Long-term effects of cholesterol lowering and angiotensin-converting enzyme inhibition on coronary atherosclerosis: The Simvastatin/Enalapril Coronary Atherosclerosis Trial (SCAT). *Circulation*. 2000;102:1748-54.
- [2] GISSI Prevention Results of the low-dose (20 mg) pravastatin GISSI Prevenzione trial in 4271 patients with recent myocardial infarction: do stopped trials contribute to overall knowledge? GISSI Prevenzione Investigators (Gruppo Italiano per lo Studio della Sopravvivenza nell'Infarto Miocardico). *Italian heart journal : official journal of the Italian Federation of Cardiology*. 2000;1:810-20.
- [3] Serruys PW, de Feyter P, Macaya C, Kokott N, Puel J, Vrolix M, et al. LIPS Fluvastatin for prevention of cardiac events following successful first percutaneous coronary intervention: a randomized controlled trial. *Jama*. 2002;287:3215-22.
- [4] Sawayama Y, Shimizu C, Maeda N, Tatsukawa M, Kinukawa N, Koyanagi S, et al. Effects of probucol and pravastatin on common carotid atherosclerosis in patients with asymptomatic hypercholesterolemia. *Fukuoka Atherosclerosis Trial (FAST). Journal of the American College of Cardiology*. 2002;39:610-6.
- [5] Officers A, Coordinators for the ACRGTA, Lipid-Lowering Treatment to Prevent Heart Attack T. Major outcomes in moderately hypercholesterolemic, hypertensive patients randomized to pravastatin vs usual care: The Antihypertensive and Lipid-Lowering Treatment to Prevent Heart Attack Trial (ALLHAT-LLT). *Jama*. 2002;288:2998-3007.
- [6] Athyros VG, Papageorgiou AA, Mercouris BR, Athyrou VV, Symeonidis AN, Basayannis EO, et al. Treatment with atorvastatin to the National Cholesterol Educational Program goal versus 'usual' care in secondary coronary heart disease prevention. The GREek Atorvastatin and Coronary-heart-disease Evaluation (GREACE) study. *Current medical research and opinion*. 2002;18:220-8.
- [7] Davidson M, Ma P, Stein EA, Gotto AM, Jr., Raza A, Chitra R, et al. Comparison of effects on low-density lipoprotein cholesterol and high-density lipoprotein cholesterol with rosuvastatin versus atorvastatin in patients with type IIa or IIb hypercholesterolemia. *Am J Cardiol*. 2002;89:268-75.
- [8] Heart Protection Study Collaborative G. Heart Protection Study of cholesterol lowering with simvastatin in 20,536 high-risk individuals: a randomised placebo-controlled trial. *Lancet*. 2002;360:7-22.
- [9] Shepherd J, Blauw GJ, Murphy MB, Bollen EL, Buckley BM, Cobbe SM, et al. Pravastatin in elderly individuals at risk of vascular disease (PROSPER): a randomised controlled trial. *Lancet*. 2002;360:1623-30.
- [10] Sever PS, Dahlof B, Poulter NR, Wedel H, Beevers G, Caulfield M, et al. Prevention of coronary and stroke events with atorvastatin in hypertensive patients who have average or lower-than-average cholesterol concentrations, in the Anglo-Scandinavian Cardiac Outcomes Trial--Lipid Lowering Arm (ASCOT-LLA): a multicentre randomised controlled trial. *Lancet*. 2003;361:1149-58.
- [11] Bruckert E, Lievre M, Giral P, Crepaldi G, Masana L, Vrolix M, et al. Short-term efficacy and safety of extended-release fluvastatin in a large cohort of elderly patients. *The American journal of geriatric cardiology*. 2003;12:225-31.

- [12] Asselbergs FW, Diercks GF, Hillege HL, van Boven AJ, Janssen WM, Voors AA, et al. Effects of fosinopril and pravastatin on cardiovascular events in subjects with microalbuminuria. *Circulation*. 2004;110:2809-16.
- [13] Koren MJ, Hunninghake DB, Investigators A. Clinical outcomes in managed-care patients with coronary heart disease treated aggressively in lipid-lowering disease management clinics: the alliance study. *Journal of the American College of Cardiology*. 2004;44:1772-9.
- [14] Mizuno K, Nakamura H, Ohashi Y, Kaburagi T, Kitabatake A, Tochiyama T, et al. A randomized, open-label, comparative study of simvastatin plus diet versus diet alone on angiographic retardation of coronary atherosclerosis in adult Japanese patients: Japanese utilization of simvastatin therapy (JUST) study. *Clinical therapeutics*. 2004;26:878-88.
- [15] Zanchetti A, Crepaldi G, Bond MG, Gallus G, Veglia F, Mancia G, et al. Different effects of antihypertensive regimens based on fosinopril or hydrochlorothiazide with or without lipid lowering by pravastatin on progression of asymptomatic carotid atherosclerosis: principal results of PHYLLIS--a randomized double-blind trial. *Stroke*. 2004;35:2807-12.
- [16] Colhoun HM, Betteridge DJ, Durrington PN, Hitman GA, Neil HA, Livingstone SJ, et al. Primary prevention of cardiovascular disease with atorvastatin in type 2 diabetes in the Collaborative Atorvastatin Diabetes Study (CARDS): multicentre randomised placebo-controlled trial. *Lancet*. 2004;364:685-96.
- [17] Cannon CP, Braunwald E, McCabe CH, Rader DJ, Rouleau JL, Belder R, et al. Intensive versus moderate lipid lowering with statins after acute coronary syndromes. *The New England journal of medicine*. 2004;350:1495-504.
- [18] de Lemos JA, Blazing MA, Wiviott SD, Lewis EF, Fox KA, White HD, et al. Early intensive vs a delayed conservative simvastatin strategy in patients with acute coronary syndromes: phase Z of the A to Z trial. *Jama*. 2004;292:1307-16.
- [19] LaRosa JC, Grundy SM, Waters DD, Shear C, Barter P, Fruchart JC, et al. Intensive lipid lowering with atorvastatin in patients with stable coronary disease. *The New England journal of medicine*. 2005;352:1425-35.
- [20] Pedersen TR, Faergeman O, Kastelein JJ, Olsson AG, Tikkanen MJ, Holme I, et al. High-dose atorvastatin vs usual-dose simvastatin for secondary prevention after myocardial infarction: the IDEAL study: a randomized controlled trial. *Jama*. 2005;294:2437-45.
- [21] Beishuizen ED, Jukema JW, Tamsma JT, van de Ree MA, van der Vijver JC, Putter H, et al. No effect of statin therapy on silent myocardial ischemia in patients with type 2 diabetes without manifest cardiovascular disease. *Diabetes care*. 2005;28:1675-9.
- [22] Stalenhoef AF, Ballantyne CM, Sarti C, Murin J, Tonstad S, Rose H, et al. A comparative study with rosuvastatin in subjects with metabolic syndrome: results of the COMETS study. *European heart journal*. 2005;26:2664-72.
- [23] Vigen C, Hodis HN, Selzer RH, Mahrer PR, Mack WJ. Coronary angiographic changes with lovastatin therapy. The Monitored Atherosclerosis Regression Study (MARS). *Am J Cardiol*. 2005;95:1277-82.
- [24] Yokoi H, Nobuyoshi M, Mitsudo K, Kawaguchi A, Yamamoto A, Investigators AS. Three-year follow-up results of angiographic intervention trial using an HMG-CoA reductase inhibitor to evaluate retardation of obstructive multiple atheroma (ATHEROMA) study. *Circulation journal : official journal of the Japanese Circulation Society*. 2005;69:875-83.

- [25] Knopp RH, d'Emden M, Smilde JG, Pocock SJ. Efficacy and safety of atorvastatin in the prevention of cardiovascular end points in subjects with type 2 diabetes: the Atorvastatin Study for Prevention of Coronary Heart Disease Endpoints in non-insulin-dependent diabetes mellitus (ASPEN). *Diabetes care*. 2006;29:1478-85.
- [26] Anderssen SA, Hjelstuen AK, Hjermmann I, Bjerkan K, Holme I. HYRIM Fluvastatin and lifestyle modification for reduction of carotid intima-media thickness and left ventricular mass progression in drug-treated hypertensives. *Atherosclerosis*. 2005;178:387-97.
- [27] Ridker PM, Danielson E, Fonseca FA, Genest J, Gotto AM, Jr., Kastelein JJ, et al. Rosuvastatin to prevent vascular events in men and women with elevated C-reactive protein. *The New England journal of medicine*. 2008;359:2195-207.
- [28] Mok VC, Lam WW, Chen XY, Wong A, Ng PW, Tsoi TH, et al. Statins for asymptomatic middle cerebral artery stenosis: The Regression of Cerebral Artery Stenosis study. *Cerebrovascular diseases*. 2009;28:18-25.
- [29] Kushiro T, Mizuno K, Nakaya N, Ohashi Y, Tajima N, Teramoto T, et al. Pravastatin for cardiovascular event primary prevention in patients with mild-to-moderate hypertension in the Management of Elevated Cholesterol in the Primary Prevention Group of Adult Japanese (MEGA) Study. *Hypertension*. 2009;53:135-41.
- [30] Study of the Effectiveness of Additional Reductions in C, Homocysteine Collaborative G, Armitage J, Bowman L, Wallendszus K, Bulbulia R, et al. Intensive lowering of LDL cholesterol with 80 mg versus 20 mg simvastatin daily in 12,064 survivors of myocardial infarction: a double-blind randomised trial. *Lancet*. 2010;376:1658-69.
- [31] Chan KL, Teo K, Dumesnil JG, Ni A, Tam J, Investigators A. Effect of Lipid lowering with rosuvastatin on progression of aortic stenosis: results of the aortic stenosis progression observation: measuring effects of rosuvastatin (ASTRONOMER) trial. *Circulation*. 2010;121:306-14.
- [32] Crouse JR, 3rd, Raichlen JS, Riley WA, Evans GW, Palmer MK, O'Leary DH, et al. Effect of rosuvastatin on progression of carotid intima-media thickness in low-risk individuals with subclinical atherosclerosis: the METEOR Trial. *Jama*. 2007;297:1344-53.
- [33] Yusuf S, Bosch J, Dagenais G, Zhu J, Xavier D, Liu L, et al. Cholesterol Lowering in Intermediate-Risk Persons without Cardiovascular Disease. *The New England journal of medicine*. 2016;374:2021-31.
- [34] Davidson MH, McGarry T, Bettis R, Melani L, Lipka LJ, LeBeaut AP, et al. Ezetimibe coadministered with simvastatin in patients with primary hypercholesterolemia. *Journal of the American College of Cardiology*. 2002;40:2125-34.
- [35] Dujovne CA, Ettinger MP, McNeer JF, Lipka LJ, LeBeaut AP, Suresh R, et al. Efficacy and safety of a potent new selective cholesterol absorption inhibitor, ezetimibe, in patients with primary hypercholesterolemia. *Am J Cardiol*. 2002;90:1092-7.
- [36] Ballantyne CM, Hourii J, Notarbartolo A, Melani L, Lipka LJ, Suresh R, et al. Effect of ezetimibe coadministered with atorvastatin in 628 patients with primary hypercholesterolemia: a prospective, randomized, double-blind trial. *Circulation*. 2003;107:2409-15.
- [37] Kerzner B, Corbelli J, Sharp S, Lipka LJ, Melani L, LeBeaut A, et al. Efficacy and safety of ezetimibe coadministered with lovastatin in primary hypercholesterolemia. *Am J Cardiol*. 2003;91:418-24.

- [38] Knopp RH, Gitter H, Truitt T, Bays H, Manion CV, Lipka LJ, et al. Effects of ezetimibe, a new cholesterol absorption inhibitor, on plasma lipids in patients with primary hypercholesterolemia. *European heart journal*. 2003;24:729-41.
- [39] Melani L, Mills R, Hassman D, Lipetz R, Lipka L, LeBeaut A, et al. Efficacy and safety of ezetimibe coadministered with pravastatin in patients with primary hypercholesterolemia: a prospective, randomized, double-blind trial. *European heart journal*. 2003;24:717-28.
- [40] Bays HE, Ose L, Fraser N, Tribble DL, Quinto K, Reyes R, et al. A multicenter, randomized, double-blind, placebo-controlled, factorial design study to evaluate the lipid-altering efficacy and safety profile of the ezetimibe/simvastatin tablet compared with ezetimibe and simvastatin monotherapy in patients with primary hypercholesterolemia. *Clinical therapeutics*. 2004;26:1758-73.
- [41] Feldman T, Koren M, Insull W, Jr., McKenney J, Schrott H, Lewin A, et al. Treatment of high-risk patients with ezetimibe plus simvastatin co-administration versus simvastatin alone to attain National Cholesterol Education Program Adult Treatment Panel III low-density lipoprotein cholesterol goals. *Am J Cardiol*. 2004;93:1481-6.
- [42] Goldberg AC, Sapre A, Liu J, Capece R, Mitchel YB, Ezetimibe Study G. Efficacy and safety of ezetimibe coadministered with simvastatin in patients with primary hypercholesterolemia: a randomized, double-blind, placebo-controlled trial. *Mayo Clinic proceedings*. 2004;79:620-9.
- [43] Cruz-Fernandez JM, Bedarida GV, Adgey J, Allen C, Johnson-Levonas AO, Massaad R. Efficacy and safety of ezetimibe co-administered with ongoing atorvastatin therapy in achieving low-density lipoprotein goal in patients with hypercholesterolemia and coronary heart disease. *International journal of clinical practice*. 2005;59:619-27.
- [44] Masana L, Mata P, Gagne C, Sirah W, Cho M, Johnson-Levonas AO, et al. Long-term safety and, tolerability profiles and lipid-modifying efficacy of ezetimibe coadministered with ongoing simvastatin treatment: a multicenter, randomized, double-blind, placebo-controlled, 48-week extension study. *Clinical therapeutics*. 2005;27:174-84.
- [45] Patel JV, Hughes EA. Efficacy, safety and LDL-C goal attainment of ezetimibe 10 mg-simvastatin 20 mg vs. placebo-simvastatin 20 mg in UK-based adults with coronary heart disease and hypercholesterolaemia. *International journal of clinical practice*. 2006;60:914-21.
- [46] Landray M, Baigent C, Leaper C, Adu D, Altmann P, Armitage J, et al. The second United Kingdom Heart and Renal Protection (UK-HARP-II) Study: a randomized controlled study of the biochemical safety and efficacy of adding ezetimibe to simvastatin as initial therapy among patients with CKD. *American journal of kidney diseases : the official journal of the National Kidney Foundation*. 2006;47:385-95.
- [47] Shankar PK, Bhat R, Prabhu M, Reddy BP, Reddy MS, Reddy M. Efficacy and tolerability of fixed-dose combination of simvastatin plus ezetimibe in patients with primary hypercholesterolemia: Results of a multicentric trial from India. *Journal of clinical lipidology*. 2007;1:264-70.
- [48] Kastelein JJ, Akdim F, Stroes ES, Zwinderman AH, Bots ML, Stalenhoef AF, et al. Simvastatin with or without ezetimibe in familial hypercholesterolemia. *The New England journal of medicine*. 2008;358:1431-43.
- [49] Strony J, Yang B, Hanson ME, Veltri EP. Long-term safety and tolerability of ezetimibe coadministered with simvastatin in hypercholesterolemic patients: a

- randomized, 12-month double-blind extension study. *Current medical research and opinion*. 2008;24:3149-57.
- [50] Arimura T, Miura S, Ike A, Sugihara M, Iwata A, Nishikawa H, et al. Comparison of the efficacy and safety of statin and statin/ezetimibe therapy after coronary stent implantation in patients with stable angina. *Journal of cardiology*. 2012;60:111-8.
- [51] Cannon CP, Blazing MA, Giugliano RP, McCagg A, White JA, Theroux P, et al. Ezetimibe Added to Statin Therapy after Acute Coronary Syndromes. *The New England journal of medicine*. 2015;372:2387-97.
- [52] Masuda J, Tanigawa T, Yamada T, Nishimura Y, Sasou T, Nakata T, et al. Effect of combination therapy of ezetimibe and rosuvastatin on regression of coronary atherosclerosis in patients with coronary artery disease. *International heart journal*. 2015;56:278-85.
- [53] Tsujita K, Sugiyama S, Sumida H, Shimomura H, Yamashita T, Yamanaga K, et al. Impact of Dual Lipid-Lowering Strategy With Ezetimibe and Atorvastatin on Coronary Plaque Regression in Patients With Percutaneous Coronary Intervention: The Multicenter Randomized Controlled PRECISE-IVUS Trial. *Journal of the American College of Cardiology*. 2015;66:495-507.
- [54] Wang X, Zhao X, Li L, Yao H, Jiang Y, Zhang J. Effects of Combination of Ezetimibe and Rosuvastatin on Coronary Artery Plaque in Patients with Coronary Heart Disease. *Heart, lung & circulation*. 2016;25:459-65.
- [55] Hagiwara N. The Heart Institute of Japan Proper level of lipid lowering with Pitavastatin and Ezetimibe in acute coronary syndrome (HIJ-PROPER), Presented at the European Society of Cardiology (ESC) Congress 2016, Rome, Italy. 2016.
- [56] Giugliano RP, Desai NR, Kohli P, Rogers WJ, Somaratne R, Huang F, et al. Efficacy, safety, and tolerability of a monoclonal antibody to proprotein convertase subtilisin/kexin type 9 in combination with a statin in patients with hypercholesterolaemia (LAPLACE-TIMI 57): a randomised, placebo-controlled, dose-ranging, phase 2 study. *Lancet*. 2012;380:2007-17.
- [57] Koren MJ, Scott R, Kim JB, Knusel B, Liu T, Lei L, et al. Efficacy, safety, and tolerability of a monoclonal antibody to proprotein convertase subtilisin/kexin type 9 as monotherapy in patients with hypercholesterolaemia (MENDEL): a randomised, double-blind, placebo-controlled, phase 2 study. *Lancet*. 2012;380:1995-2006.
- [58] McKenney JM, Koren MJ, Kereiakes DJ, Hanotin C, Ferrand AC, Stein EA. Safety and efficacy of a monoclonal antibody to proprotein convertase subtilisin/kexin type 9 serine protease, SAR236553/REGN727, in patients with primary hypercholesterolemia receiving ongoing stable atorvastatin therapy. *Journal of the American College of Cardiology*. 2012;59:2344-53.
- [59] Raal F, Scott R, Somaratne R, Bridges I, Li G, Wasserman SM, et al. Low-density lipoprotein cholesterol-lowering effects of AMG 145, a monoclonal antibody to proprotein convertase subtilisin/kexin type 9 serine protease in patients with heterozygous familial hypercholesterolemia: the Reduction of LDL-C with PCSK9 Inhibition in Heterozygous Familial Hypercholesterolemia Disorder (RUTHERFORD) randomized trial. *Circulation*. 2012;126:2408-17.
- [60] Roth EM, McKenney JM, Hanotin C, Asset G, Stein EA. Atorvastatin with or without an antibody to PCSK9 in primary hypercholesterolemia. *The New England journal of medicine*. 2012;367:1891-900.
- [61] Stein EA, Gipe D, Bergeron J, Gaudet D, Weiss R, Dufour R, et al. Effect of a monoclonal antibody to PCSK9, REGN727/SAR236553, to reduce low-density lipoprotein cholesterol in patients with heterozygous familial hypercholesterolaemia

- on stable statin dose with or without ezetimibe therapy: a phase 2 randomised controlled trial. *Lancet*. 2012;380:29-36.
- [62] Sullivan D, Olsson AG, Scott R, Kim JB, Xue A, GebSKI V, et al. Effect of a monoclonal antibody to PCSK9 on low-density lipoprotein cholesterol levels in statin-intolerant patients: the GAUSS randomized trial. *Jama*. 2012;308:2497-506.
- [63] Blom DJ, Hala T, Bolognese M, Lillestol MJ, Toth PD, Burgess L, et al. A 52-week placebo-controlled trial of evolocumab in hyperlipidemia. *The New England journal of medicine*. 2014;370:1809-19.
- [64] Hirayama A, Honarpour N, Yoshida M, Yamashita S, Huang F, Wasserman SM, et al. Effects of evolocumab (AMG 145), a monoclonal antibody to PCSK9, in hypercholesterolemic, statin-treated Japanese patients at high cardiovascular risk--primary results from the phase 2 YUKAWA study. *Circulation journal : official journal of the Japanese Circulation Society*. 2014;78:1073-82.
- [65] Koren MJ, Lundqvist P, Bolognese M, Neutel JM, Monsalvo ML, Yang J, et al. Anti-PCSK9 monotherapy for hypercholesterolemia: the MENDEL-2 randomized, controlled phase III clinical trial of evolocumab. *Journal of the American College of Cardiology*. 2014;63:2531-40.
- [66] Robinson JG, Nedergaard BS, Rogers WJ, Fialkow J, Neutel JM, Ramstad D, et al. Effect of evolocumab or ezetimibe added to moderate- or high-intensity statin therapy on LDL-C lowering in patients with hypercholesterolemia: the LAPLACE-2 randomized clinical trial. *Jama*. 2014;311:1870-82.
- [67] Stroes E, Colquhoun D, Sullivan D, Civeira F, Rosenson RS, Watts GF, et al. Anti-PCSK9 antibody effectively lowers cholesterol in patients with statin intolerance: the GAUSS-2 randomized, placebo-controlled phase 3 clinical trial of evolocumab. *Journal of the American College of Cardiology*. 2014;63:2541-8.
- [68] Bays H, Gaudet D, Weiss R, Ruiz JL, Watts GF, Gouni-Berthold I, et al. ODYSSEY Alirocumab as Add-On to Atorvastatin Versus Other Lipid Treatment Strategies: ODYSSEY OPTIONS I Randomized Trial. *The Journal of clinical endocrinology and metabolism*. 2015;100:3140-8.
- [69] Cannon CP, Cariou B, Blom D, McKenney JM, Lorenzato C, Pordy R, et al. Efficacy and safety of alirocumab in high cardiovascular risk patients with inadequately controlled hypercholesterolaemia on maximally tolerated doses of statins: the ODYSSEY COMBO II randomized controlled trial. *European heart journal*. 2015;36:1186-94.
- [70] Kastelein JJ, Ginsberg HN, Langslet G, Hovingh GK, Ceska R, Dufour R, et al. ODYSSEY FH I and FH II: 78 week results with alirocumab treatment in 735 patients with heterozygous familial hypercholesterolaemia. *European heart journal*. 2015;36:2996-3003.
- [71] Kereiakes DJ, Robinson JG, Cannon CP, Lorenzato C, Pordy R, Chaudhari U, et al. Efficacy and safety of the proprotein convertase subtilisin/kexin type 9 inhibitor alirocumab among high cardiovascular risk patients on maximally tolerated statin therapy: The ODYSSEY COMBO I study. *American heart journal*. 2015;169:906-15 e13.
- [72] Moriarty PM, Thompson PD, Cannon CP, Guyton JR, Bergeron J, Zieve FJ, et al. Efficacy and safety of alirocumab vs ezetimibe in statin-intolerant patients, with a statin rechallenge arm: The ODYSSEY ALTERNATIVE randomized trial. *Journal of clinical lipidology*. 2015;9:758-69.
- [73] Raal FJ, Stein EA, Dufour R, Turner T, Civeira F, Burgess L, et al. PCSK9 inhibition with evolocumab (AMG 145) in heterozygous familial

hypercholesterolaemia (RUTHERFORD-2): a randomised, double-blind, placebo-controlled trial. *Lancet*. 2015;385:331-40.

[74] Robinson JG, Farnier M, Krempf M, Bergeron J, Luc G, Aversa M, et al. Efficacy and safety of alirocumab in reducing lipids and cardiovascular events. *The New England journal of medicine*. 2015;372:1489-99.

[75] Roth EM, McKenney JM. ODYSSEY MONO: effect of alirocumab 75 mg subcutaneously every 2 weeks as monotherapy versus ezetimibe over 24 weeks. *Future cardiology*. 2015;11:27-37.

[76] Koren MJ, Sabatine MS, Giugliano RP, Langslet G, Wiviott SD, Kassahun H, et al. Long-term Low-Density Lipoprotein Cholesterol-Lowering Efficacy, Persistence, and Safety of Evolocumab in Treatment of Hypercholesterolemia: Results Up to 4 Years From the Open-Label OSLER-1 Extension Study. *JAMA cardiology*. 2017.

[77] Sabatine MS, Giugliano RP, Wiviott SD, Raal FJ, Blom DJ, Robinson J, et al. Efficacy and safety of evolocumab in reducing lipids and cardiovascular events. *The New England journal of medicine*. 2015;372:1500-9.

[78] Farnier M, Jones P, Severance R, Aversa M, Steinhagen-Thiessen E, Colhoun HM, et al. Efficacy and safety of adding alirocumab to rosuvastatin versus adding ezetimibe or doubling the rosuvastatin dose in high cardiovascular-risk patients: The ODYSSEY OPTIONS II randomized trial. *Atherosclerosis*. 2016;244:138-46.

[79] Kiyosue A, Honarpour N, Kurtz C, Xue A, Wasserman SM, Hirayama A. A Phase 3 Study of Evolocumab (AMG 145) in Statin-Treated Japanese Patients at High Cardiovascular Risk. *Am J Cardiol*. 2016;117:40-7.

[80] Nissen SE, Stroes E, Dent-Acosta RE, Rosenson RS, Lehman SJ, Sattar N, et al. Efficacy and Tolerability of Evolocumab vs Ezetimibe in Patients With Muscle-Related Statin Intolerance: The GAUSS-3 Randomized Clinical Trial. *Jama*. 2016;315:1580-90.

[81] Ginsberg HN, Rader DJ, Raal FJ, Guyton JR, Baccara-Dinet MT, Lorenzato C, et al. Efficacy and Safety of Alirocumab in Patients with Heterozygous Familial Hypercholesterolemia and LDL-C of 160 mg/dl or Higher. *Cardiovascular drugs and therapy*. 2016;30:473-83.

[82] Nicholls SJ, Puri R, Anderson T, Ballantyne CM, Cho L, Kastelein JJ, et al. Effect of Evolocumab on Progression of Coronary Disease in Statin-Treated Patients: The GLAGOV Randomized Clinical Trial. *Jama*. 2016;316:2373-84.

[83] Ridker PM, Tardif JC, Amarenco P, Duggan W, Glynn RJ, Jukema JW, et al. Lipid-Reduction Variability and Antidrug-Antibody Formation with Bococizumab. *The New England journal of medicine*. 2017.

[84] Sabatine MS, Giugliano RP, Keech AC, Honarpour N, Wiviott SD, Murphy SA, et al. Evolocumab and Clinical Outcomes in Patients with Cardiovascular Disease. *The New England journal of medicine*. 2017.

[85] Evaluation of Cardiovascular Outcomes After an Acute Coronary Syndrome During Treatment With Alirocumab - ODYSSEY OUTCOMES.

<http://www.acc.org/latest-in-cardiology/clinical-trials/2018/03/09/08/02/odyssey-outcomes>
